1 ***Staphylococcus aureus* toxin LukSF dissociates from its membrane receptor target to enable**  
2 **renewed ligand sequestration**

3

4 **Authors:**

5 Karita Haapasalo<sup>1,2,4</sup>, Adam J. M. Wollman<sup>3,4</sup>, Carla de Haas<sup>1</sup>, Kok van Kessel<sup>1</sup>, Jos van Strijp<sup>1</sup>, Mark  
6 C. Leake<sup>3,5,\*</sup>

7 <sup>1</sup> Department of Medical Microbiology, University Medical Center Utrecht, Utrecht University,  
8 Utrecht, The Netherlands

9 <sup>2</sup> Department of Bacteriology and Immunology, and Research Programs Unit, Immunobiology,  
10 University of Helsinki, Helsinki, 00014, Finland

11 <sup>3</sup> Biological Physical Sciences Institute, Departments of Physics and Biology, University of York,  
12 York, YO10 5DD, United Kingdom

13

14 <sup>4</sup> These authors contributed equally

15 <sup>5</sup> Lead contact: Prof Mark Leake, Biological Physical Sciences Institute, Departments of Physics and  
16 Biology, University of York, York YO10 5DD, UK. Tel: +44 (0)1904322697. Email:  
17 mark.leake@york.ac.uk. Orcid ID: <http://orcid.org/0000-0002-1715-1249>.

18 \* Correspondence: Email: mark.leake@york.ac.uk.

19

20 **Keywords:** bacterial toxin; pore formation; single-molecule; super-resolution; immune response.

21 **ABSTRACT**

22 **Background:** *Staphylococcus aureus* Panton Valentine Leukocidin (PVL) is a pore-forming toxin  
23 targeting the human C5a receptor (hC5aR), enabling this pathogen to battle the immune response by  
24 destroying phagocytes through targeted lysis. The mechanisms that contribute to rapid cell lysis are  
25 largely unexplored.

26 **Results:** Here we show that cell lysis may be enabled by a process of toxins targeting receptor clusters  
27 and receptor ‘recycling’ which allows multiple toxin pores to be formed close together. Using live cell  
28 single-molecule super-resolution imaging, Förster resonance energy transfer (FRET) and nanoscale  
29 total internal reflection fluorescence (TIRF) colocalization microscopy we visualized toxin pore  
30 formation in the presence of its natural docking ligand.

31 **Conclusions:** We demonstrate disassociation of hC5aR from toxin complexes and simultaneous  
32 binding of new ligands. This effect may free mobile receptors to amplify hyper inflammatory reactions  
33 in early stages of microbial infections and have implications for several other similar bi-component  
34 toxins and the design of new antibiotics.

35

36

37

38

39

## 40 BACKGROUND

41 *S. aureus* causes diseases ranging from superficial skin and soft tissue infections (SSTI) to severe  
42 invasive diseases like osteomyelitis and necrotizing pneumonia [1]. During the 1960s, methicillin-  
43 resistant *Staphylococcus aureus* (MRSA) was identified as a nosocomial pathogen [2]. In the 1990s,  
44 infection of previously healthy community-dwelling individuals with MRSA was reported [3]. Since  
45 then, these community-associated (CA-) MRSA have rapidly emerged worldwide [4]. Variants have  
46 also recently been identified which have reduced susceptibility to the antibiotic vancomycin [5] as well  
47 as complete resistance, so-called VRSA [6], and these forms of *S. aureus* pose a significant threat to  
48 human health. *S. aureus* and resistant variants have also evolved adaptations to evade attack from cells  
49 of the human immune system. However, the molecular processes which underlie these strategies are  
50 underexplored in living cells. There are compelling scientific and societal motivations to understand the  
51 mechanisms involved in immunogenic evasion strategies of *S. aureus*.

52 In the early 1930s, Pantan and Valentine described a powerful leukocidal toxin produced by  
53 multiple *S. aureus* isolates, now denoted Pantan-Valentine Leukocidin (PVL), years later shown to be  
54 cytotoxic to neutrophils, monocytes and macrophages but not to lymphocytes [7, 8]. The majority of  
55 CA-MRSA isolates carry the genes encoding PVL, partially due to the successful spread of the PVL  
56 carrying clone USA300 in the USA [3, 4, 9, 10], rarely present in hospital-acquired antimicrobial  
57 resistant MRSA and methicillin susceptible *S. aureus* isolates. Based on epidemiological studies, PVL  
58 is associated with primary skin infections in humans, osteomyelitis and, in particular, severe  
59 necrotizing pneumonia [11, 12]. Necrotizing pneumonia is a severe complication caused by bacterial  
60 lung infection. It is characterized by massive recruitment of neutrophils in the site of infection, diffuse  
61 pulmonary inflammation, septic shock, and respiratory failure. Both host factors and microbial  
62 virulence factors are thought to play an important role in the inflammation, however, it is unknown

63 how the interplay between these two factors affects the severity of the disease [13]. The specificity to  
64 cell surface receptors makes it difficult to study PVL's role in *S. aureus* pathogenesis in a whole animal  
65 model. It is possible that lysis of neutrophils by PVL is responsible for a reduced host defense response  
66 allowing the pathogen to spread and cause eventual tissue damage. However, a previous study using a  
67 rabbit animal model on necrotizing pneumonia suggests that PVL itself directly or indirectly causes  
68 tissue injury and by this way induces local inflammation [14].

69 PVL is a pro-phage encoded bi-component,  $\beta$ -barrel pore-forming toxin ( $\beta$ -PFT) comprising  
70 protein subunits LukS and LukF. LukS binding to the surface of target cells induces secondary LukF  
71 binding; chemical and genetic analysis suggests that the resulting complex consists of a lytic pore-  
72 forming hetero-octamer [15, 16]. Stoichiometric analysis *in vitro* of this complex suggests it is an  
73 octamer of 4-plus-4 subunits [17]. In this complex only LukS is known to interact with the human C5a  
74 receptor (hC5aR, CD88), a G-protein coupled seven-transmembrane receptor (GPCR). LukS targets at  
75 least the extracellular N-terminus of hC5aR [18, 19], similar to the chemotaxis inhibitory protein of *S.*  
76 *aureus* (CHIPS), but may also interact with the transmembrane receptor region [20]. C5aR is the ligand  
77 for C5a, a powerful anaphylatoxin released during complement activation. Complement is a powerful  
78 first line defense mechanism against invading pathogens which can be initiated through three  
79 pathways: the classical, lectin, or alternative pathways. Activation of any of the three pathways on the  
80 target leads to a rapid opsonization with C3b [21]. Further activation of complement leads to initiation  
81 of the terminal pathway with release of C5a and formation of membrane attack complexes that are lytic  
82 for Gram-negative but not Gram-positive bacteria [22, 23]. Therefore, in defense against Gram-positive  
83 bacteria C3b-opsonization together with attraction and activation of neutrophils via C5a-C5aR  
84 interaction are essential [24, 25]. In severe cases, formation of C5a can potentially lead to hyper  
85 activation of the inflammatory response, an inability to regulate this potentially fatal reaction and

86 eventually harm the human host tissues. Because of this strong pro-inflammatory activity, therapeutic  
87 interventions have recently focused on neutralizing antibodies against C5a and C5aR as potential  
88 candidates for the treatment of severe inflammatory conditions such as bacterial induced sepsis [26,  
89 27].

90 LukS binding to hC5aR inhibits C5a receptor binding which efficiently blocks neutrophil  
91 activation [18]. LukS receptor binding alone is not sufficient for cell lysis but requires simultaneous  
92 interaction between the leukocidin subunits and hC5aR. However, multiple possible subunit and  
93 receptor combinations are theoretically possible and the spatiotemporal dynamics in functional  
94 complexes in live cells between LukS, LukF and hC5aR is not yet known. In addition to PVL *S. aureus*  
95 can produce a number of other  $\beta$ -PFTs with varying receptor and cell type specificities. From these  
96 LukED, LukAB (or LukGH) and  $\gamma$ -hemolysin (composed of two compound pairs, HlgA/HlgB or  
97 HlgC/HlgB) are classified as bi-component toxins like PVL while  $\alpha$ -hemolysin is the prototypical  $\beta$ -  
98 PFT that assembles into a pore through the oligomerization of seven monomeric polypeptides [28].

99 Next to bacterial toxins, an entire group of other pore forming proteins have been identified  
100 which are involved in human innate immunity, indicating that pore-forming proteins are employed in  
101 survival strategies for several types of organisms [29]. Development of methods to study dynamic  
102 processes of pore formation by these toxins at a molecular level may improve our understanding of the  
103 evolution of bacterial virulence and human immunity. There are several studies that have attempted to  
104 explain the function of bacterial PFTs, including structural and subunit stoichiometry data from high  
105 resolution X-ray crystallography and single-molecule fluorescence microscopy [17, 30, 31]. However,  
106 these studies focused on pathogen instead of host factors and were thereby limited in excluding the  
107 specific interaction between host cell receptor and bacterial toxin component, the first step required for

108 toxin oligomerization on the host cell membrane and the presence of the most potent factor mediating  
109 the inflammatory response via C5a recognition in the site of infection [18].

110 Here, we used standard and single-molecule fluorescence detection with super-resolution  
111 localization microscopy [32] to determine protein complex assembly on receptors in live and fixed cell  
112 membranes. We studied human embryonic kidney (HEK) cells modified to express monomeric Green  
113 Fluorescent Protein (mGFP) labeled hC5aR, exposed to Alexa dye-labeled *S. aureus* toxin components  
114 LukS and LukF and imaged using standard total internal reflection fluorescence (TIRF) real time  
115 microscopy (Additional file 1: Figure S1a) allowing us to monitor the spatiotemporal dynamics of  
116 receptor and toxin molecules in the cell membrane. Our findings indicate that LukS binds on clusters of  
117 membrane-integrated hC5aRs. The receptor-bound LukS then binds LukF leading to the formation of a  
118 pore that is consistent with previous stoichiometric studies. However, when LukF is bound to the  
119 complex, we observe fewer colocalized hC5aRs with toxin in fixed cells, more immobilized toxin  
120 complexes in live cells and a significantly reduced Förster resonance energy transfer (FRET) signal,  
121 indicating, unexpectedly, that pore formation leads to simultaneous dissociation of the receptors from  
122 the complex. In addition, our biochemical data suggests that the dissociated receptor can then be  
123 available for additional LukS molecules or the C5a generated during complement activation as a  
124 response to LukSF-mediated cell lysis. This new finding suggests that a limited number of receptors  
125 can be ‘recycled’ as docking for further toxin. This ensures that a sufficient number of pores will  
126 damage nearby phagocytic cells, particularly important when high numbers of C5a anaphylatoxin are  
127 blocking LukS, and potentially also enables simultaneous C5a mediated inflammatory response on  
128 adjacent cells.

129

130 **RESULTS**

131 **Maleimide-labeled LukSF mediates toxicity on human polymorphonuclear (PMN) and HEK**  
132 **cells.** To study LukSF pore formation on live cells using single-molecule fluorescence microscopy,  
133 single cysteine substitutions on the exposed surface of the cap domain of the individual toxins  
134 (Additional file 1: Figure S1b), K288C on LukF and K281C on LukS, were engineered to facilitate  
135 maleimide labeling. These were denoted as the modified protein mLukF or mLukS. A second  
136 substitution Y113H on LukS was chosen on the stem domain to facilitate pore formation of the LukS  
137 mutant (mLukS), based on previous studies [17]. We compared the lytic activity of these mutants to  
138 their unmodified wild type equivalents by measuring PMN membrane permeabilization after 30 min  
139 toxin exposure using the DNA-binding fluorescent dye DAPI by flow cytometry. DAPI does not  
140 penetrate intact cell membranes, and is therefore a good measure for cell permeability and cell death. In  
141 this assay each of the wild type toxins was replaced with the modified protein either unlabeled (mLukF  
142 or mLukS) or with a single Alexa647 dye molecule label (mLukF\* or mLukS\*) (Figure 1). All  
143 modified toxins induced PMN permeabilisation reaching 100% at ~3 nM (Figure 1a), interchangeable  
144 with the wild type equivalents. Only maleimide-labeled mLukF (mLukF\*) lost activity and required  
145 ~30 nM to reach 100% permeabilization. Since the LukS component mediates the toxin recognition on  
146 the target C5aR, we evaluated the binding potency of mLukS and mLukS\* on PMNs. In this assay,  
147 mLukS was able to inhibit the interaction of FITC-labeled wild type LukS on PMNs equally well as the  
148 maleimide-labeled mLukS\* (Figure 1b).

149

150           The LukSF toxin is known to be specific towards human cells expressing human C5aR (hC5aR)  
151 such as neutrophils, monocytes and macrophages but does not lyse cells that do not express the  
152 receptor [18]. To report on the spatiotemporal localization of the receptor and for determining the  
153 subunit stoichiometry in any observed receptor clusters we prepared HEK cells expressing hC5aR with  
154 a monomeric variant (bearing the obligate-monomer mutation A206K) of green fluorescent protein  
155 (mGFP) cloned in the C-terminal end of the receptor. This cell line also forms a monolayer on the  
156 coverslip and can be used for introducing a single dye on the cloned receptor, requirements for TIRF  
157 and single-molecule imaging. We verified the specificity and activity of the mutated and labeled toxins  
158 on the HEK-hC5aR cells. As expected, the toxins lysed only cells expressing hC5aR while control  
159 hCCR2 expressing cells, that do not bind LukS [33], remained intact (Figure 1d). We did not observe  
160 any binding of mLukF\* on the same cells (Figure 1c) which is consistent with previous observations  
161 that LukF in the absence of LukS does not interact with PMN [16]. The unlabeled mLukS inhibited  
162 binding of mLukS\* in a dose-dependent fashion (Figure 1e). HEK cells transfected with hC5aR  
163 required higher toxin concentrations for optimal binding and lysis by mLukSF as compared with PMN  
164 which is in agreement with previous data for the wild type variants [33]. We did not compare the  
165 hC5aR expression levels between these cells as PMNs also express another ligand for LukS, C5LR (or  
166 C5aR2) and because C5aR expression levels are not stable in neutrophils but can easily change in  
167 natural settings for example as a response to increased C5a levels [34].

168           To be able to analyze the dynamics of receptor and toxin interactions, we verified the conditions  
169 required for HEK cell lysis in time in the presence of mLukF and mLukS. Since the maleimide-labeled  
170 mLukF\* required higher concentrations for efficient lysis of HEK cells, and because of the loss of  
171 molecules during washing cycles, the assay was optimized to have 20-fold excess of mLukF\*  
172 (600 nM). Following pre-incubation of hC5aR-mGFP expressing HEK cells with LukS(wt) or mLukS,



173 LukF(wt) or mLukF\* was added and the cellular uptake of DAPI was measured by flow cytometry  
174 every 5 min. The wild type toxins LukF(wt) and LukS(wt) caused >80% cell toxicity within 10 min,  
175 while closer to 20 min was required for significant lysis by the mLukF\* and mLukS toxin combination  
176 (Figure 1f).

177 **Standard TIRF microscopy of live cells shows LukS colocalizes to hC5aR, and causes cell lysis**  
178 **upon addition of LukF.** For life cell imaging we first set the conditions to facilitate data acquisition of  
179 dynamic events involved in the formation of LukSF nanopores in hC5aR-mGFP HEK cell membranes.  
180 We sampled every 2.5 s at 50 ms exposure time per frame using standard (non single-molecule) total  
181 internal reflection fluorescence (TIRF) microscopy, at very low excitation intensity to prevent  
182 photobleaching. Cells were first imaged in the absence of toxin. In the green channel we observed  
183 mGFP localization consistent with the cell membrane, manifest as relatively high apparent brightness  
184 towards the cell boundaries consistent with the cell membrane curving away from the microscope  
185 coverslip perpendicular to the TIRF excitation field. Controlled addition of mLukS\* (labeled with  
186 Alexa647) to the sample Petri dish followed by washing, while imaging simultaneously throughout,  
187 resulted in colocalization of the hC5aR and mLukS (Figure 2, Additional file 6: Movie 1), with an  
188 image structural similarity index of ~0.75. Further addition of mLukF resulted in complete lysis of the  
189 cell, as defined by the observation of explosive release of membrane vesicles, after ~15 min (Figure 2,  
190 Additional file 7: Movie 2). Colocalization of hC5aR-GFP, mLukS\* (Alexa647) and mLukF\*  
191 (Alexa594) was also confirmed by three color experiments, imaging cells after addition of toxins and  
192 washes until the start of lysis (Figure 2). In the given mLukF concentrations and time frame, where  
193 imaging was possible without immediate cell lysis, also free hC5aR could be detected without mLukSF  
194 colocalization.

195

196 **Single-molecule TIRF microscopy of live cells shows LukS forms tetramers, and clusters hC5aR**  
197 **before binding LukF.** Using higher laser intensity TIRF excitation enabled rapid millisecond single  
198 color channel sampling of single fluorophores faster than their molecular mobility in the cell membrane  
199 [35], confirmed by imaging antibody-immobilized mGFP and Alexa dyes (Additional file 2: Figure  
200 S2). Imaging live hC5aR-mGFP cells in these conditions saturated the camera CCD but after 1-2 min  
201 of exposure, photobleaching was sufficient to reduce intensity and allow us to observe several distinct,  
202 mobile, circular fluorescent foci at a mean surface density of  $\sim 1$  per  $\mu\text{m}^2$  in the planar membrane  
203 regions which lie parallel to the TIRF field away from the cell boundaries (Figure 3a, Additional file 8:  
204 Movie 3). We monitored the spatiotemporal dynamics of foci in the planar membrane regions using  
205 automated tracking software [36] which allowed foci to be tracked for several seconds to a spatial  
206 precision of  $\sim 40$  nm [37], below the diffraction limit, thus enabling super-resolution localization data to  
207 be obtained. The measured focus width (defined as the half width at half maximum determined from  
208 their pixel intensity profile) was in the range 200-300 nm, consistent with the point spread function  
209 (PSF) width of our microscope. By using step-wise photobleaching analysis we estimated  
210 stoichiometry values for all detected fluorescent foci by employing a method which quantifies the  
211 initial unbleached foci brightness and divides this by the measured brightness for the relevant single  
212 dye reporter molecule (Additional file 2: Figure S2) [38]. These foci contained large numbers of  
213 receptors with a mean stoichiometry of  $\sim 180$  (Figure 3b, Table 1). Addition of mLukS and mLukF  
214 increased the mean stoichiometry by  $>50\%$  consistent with the toxin causing receptor clustering.

215         Imaging mLukS\* incubated with hC5aR-mGFP cells revealed distinct foci (Figure 3a,  
216 Additional file 9: Movie 4). The probability distribution of mLukS\* stoichiometry values in live cells  
217 in the absence of mLukF is shown in Figure 3c, rendered using a kernel density estimation which  
218 generates an objective distribution that does not depend upon the size and location of subjective

219 histogram bins [39]. We measured a broad range of stoichiometry values, spanning a range from only a  
220 few LukS molecules per foci to several tens of molecules, with a mean of ~30 molecules per foci.  
221 Closer inspection of the stoichiometry values indicated an underlying periodicity to their probability  
222 distribution, which we investigated using Fourier spectral analysis [40]. The resulting power spectrum  
223 (Figure 3d) indicated a fundamental peak equivalent to a stoichiometry of  $3.9 \pm 0.2$  molecules,  
224 suggesting that foci are composed of multiples of tetrameric mLukS\* complexes.

225         Fluorescent foci, if separated by less than the diffraction-limited PSF width of our microscope,  
226 are detected as a single particle but with higher apparent stoichiometry. We therefore tested the  
227 hypothesis that the observed mLukS\* foci stoichiometry distribution could be explained by the random  
228 overlap of isolated mLukS\* tetramer foci. To do so we modeled the nearest-neighbor separations of  
229 individual mLukS\* tetramers in the cell membrane as a random Poisson distribution [41] and used  
230 sensible ranges of tetramer surface density based on our single particle tracking results (Additional file  
231 3: Figure S3). However, all random tetramer overlap models we explored showed poor agreement to  
232 the observed experimental stoichiometry distribution, but we found that random overlap of multimers  
233 of tetramers could account for the stoichiometry distribution well (Figure 3e). Optimized fits indicated  
234 that the random overlap of mLukS\* foci with a stoichiometry in the range 4-20 molecules were able to  
235 best account for the experimental data. As hC5aR is clustered, this likely accounts for the clustering of  
236 mLukS\* but not its tetrameric periodicity. These results are consistent with mLukS\* binding to clusters  
237 of hC5aR as tetramers or forming tetrameric sub-structures.

238         We tested if there was a dependence of foci stoichiometry on incubation time with leukocidin.  
239 Acquiring a time course for mLukF\* accumulation following pre-incubation of cells with mLukS was  
240 not feasible since unbound mLukF\* had to be washed from the sample to prevent a prohibitively high  
241 fluorescent background. However, we were able to acquire time courses in which mLukF was added to

242 cells that had been pre-incubated with mLukS\*. For these, the mLukS\* foci stoichiometry distribution  
243 was measured as a function of time after mLukF addition for several different fields of view, each  
244 containing typically ~5 cells. We found that the mean hC5aR foci stoichiometry indicated no obvious  
245 correlation to mLukF incubation time (Figure 3f), however the mean mLukS\* foci stoichiometry  
246 increased with time ( $p < 0.05$ ).

247 By calculating the mean square displacement (MSD) as a function of time interval ( $\tau$ ) for each  
248 tracked foci we could determine its apparent microscopic diffusion coefficient ( $D$ ). The distribution of  
249  $D$  for hC5aR and mLukS\*/mLukF (Additional file 4: Figure S4) had similar low value peaks at  
250  $\sim 0.05 \mu\text{m}^2/\text{s}$ , consistent with immobile foci tracked with our localization precision spatial precision of  
251 40 nm. Several mobile foci were also seen, which diffused at rates up to  $\sim 5 \mu\text{m}^2/\text{s}$ . Based on the  
252 measured width of the immobile peak width on these distributions we set a threshold of  $0.12 \mu\text{m}^2/\text{s}$  to  
253 categorize foci as either immobile, which indicated a mean  $D = 0.025 \pm 0.030 \mu\text{m}^2/\text{s}$  ( $\pm\text{SD}$ ), or mobile,  
254 which indicated a mean  $D = 0.47 \pm 0.40 \mu\text{m}^2/\text{s}$  (Table 1). Plots of the measured MSD vs.  $\tau$  relations for  
255 mobile foci indicated a linear dependence indicative of free Brownian (i.e. 'normal') diffusion.  
256 However, similar plots for immobile foci indicated an asymptotic dependence consistent with confined  
257 diffusion [42], whose plateau was equivalent to a confinement diameter of  $\sim 400$  nm (Additional file 4:  
258 Figure S4). The relative proportion of mobile foci was  $\sim 35\%$  of tracked foci for hC5aR, regardless of  
259 toxin and similar for mLukS in the absence of mLukF. Addition of mLukF, caused a drop in the mobile  
260 proportion by a factor of  $\sim 3$  (Figure 3g) suggesting that LukF causes insertion of the complex and  
261 possible disassociation of the LukSF complex from the hC5aR.

262 **Single-molecule TIRF microscopy combined with colocalization analysis of fixed cells suggests**

263 **LukSF dissociates from the receptor.** Due to the high image frame rate of single-molecule TIRF

264 microscopy, we were not able to simultaneously image two color channels on our microscope, rather

265 each channel was imaged separately in the same cells. Therefore to determine whether the toxin  
266 remains bound to the receptor, and to quantify the relative stoichiometry of components, we imaged  
267 fixed cells, halting cell lysis, using the same two spectrally distinct green/red dyes of mGFP and  
268 Alexa647 to label receptor and toxin components, respectively, as for the live cell experiments. We  
269 imaged cells incubated with mLukS\*, followed by incubation with mLukF (Figure 4a upper panels) as  
270 well as simultaneously with mLukS+mLukF\* (Figure 4a lower panels) and observed foci with similar  
271 stoichiometries (Table 1) to live cells but colocalized with hC5aR. Around 32% of the hC5aR foci were  
272 found colocalized in the presence of mLukS\* dropping to <10% in the presence of mLukF (Figure 4b).  
273 This low percentage was within our estimate of the degree of random colocalization between the green  
274 and red fluorophores, entirely down to chance, of ~10%. This suggests that in the presence of mLukF,  
275 the toxin is not colocalized with the receptor and that mLukF causes disassociation from hC5aR. The  
276 stoichiometry values for detected green hC5aR-mGFP foci were calculated and plotted against the  
277 equivalent stoichiometry estimates for colocalized red foci of mLukS\* and mLukF\* respectively (Figure  
278 4c and Additional file 5: Figure S5). In the presence of mLukS\* but in the absence of mLukF, the  
279 hC5aR-mGFP foci stoichiometry showed an approximately linear dependence on number of associated  
280 mLukS\* molecules, suggesting that each colocalized mLukS\* molecule was associated on average  
281 with ~4-5 hC5aR molecules. In the presence of labeled or unlabeled mLukF no dependence was  
282 observed (Additional file 5: Figure S5,  $R^2 < 0$ ) consistent with random association between toxin and  
283 receptor. These results are unlikely to be due to fluorescence quenching, as it would need to be near  
284 100% quenching to detect no Alexa fluorescence in the hC5aR-mGFP foci and the drop in  
285 colocalization is observed independent of the labeled toxin used, either mLukS\* with mLukF or  
286 mLukF\* with mLukS.

287 **Live whole cell FRET and biochemical measurements also support LukSF disassociation:** We  
288 performed FRET experiments on FITC sortase-labeled hC5aR and Cy3-labeled mLukS or mLukF, as  
289 donor and acceptor respectively, in live cells to further probe the association between toxin and  
290 receptor. A FRET signal from whole cells of 75% efficiency was observed, with a statistically  
291 significant drop ( $p=0.008$ , Student's *t*-test) to 56% when incubated with unlabeled mLukF (Figure 4d  
292 and e), as would be expected if the complex formation leads to dissociation of the toxin from the  
293 receptor. In order to examine possible FRET between hC5aR and Cy3-labeled mLukF we performed  
294 similar experiments on fixed cells. In these experiments a FRET efficiency of 60% was observed  
295 between hC5aR and labeled mLukS dropping below 40% ( $p=0.023$ , Student's *t*-test) between hC5aR  
296 and labeled mLukF. As expected, no FRET signal was observed in the negative control where only  
297 Cy3-labeled mLukF was present. These results are also consistent with the finding that hC5aR  
298 dissociates from the LukSF pore, although conformational or local environment changes cannot be  
299 ruled out with FRET alone since the relatively high remaining signal might in principle also indicate  
300 remaining association or other inter or intra hC5aR-Luk interaction. The greater drop in FRET when  
301 measured with mLukF compared to mLukS might be caused by the 3-4 nm further distance of LukF  
302 from hC5aR.

303 To further confirm that the LukSF complex dissociates from the target receptor we used a  
304 monoclonal PE-labeled anti-CD88 antibody to detect the liberation of free hC5aR receptors on the cell  
305 membrane upon LukSF formation. We first confirmed the ability of both C5a and wild type LukS to  
306 compete for binding of the anti-CD88 antibody to the hC5aR expressing HEK cells. Both ligands  
307 showed clear inhibition of anti-CD88 binding at 100 nM concentrations while LukF was ineffective  
308 (Figure 5a). However, when the hC5aR expressing cells were incubated with 100 nM of LukS followed  
309 by incubation with increasing concentrations of wild type LukF to form an active toxin, a statistically

310 significant increase in anti-CD88 binding was detected at a LukF concentration of 1nM when compared  
311 to no LukF (0 nM) . Addition of a control protein Ecb did not change anti-CD88 binding. Cell  
312 permeabilization was measured in parallel and proved to be “sublytic” enabling proper detection of  
313 liberated anti-CD88 without significant cell lysis (% of lysed cells < 10%) (Figure 5b). At a 3 nM LukF  
314 concentration the proportion of dead cells increased above 10% which determined the maximum  
315 concentration and increase in anti-CD88 binding that could be measured. The changes in C5aR  
316 mobility, colocalization, and FRET with addition of LukF, combined with the biochemical evidence of  
317 anti-CD88 rebinding on hC5aR upon LukF(wt) addition on LukS(wt) coated cells are strongly  
318 indicative of disassociation of the LukSF complex.

319 **Dissociation of LukSF pores from hC5aR allows rebinding of C5a or intact LukS on the receptor.**

320 Since C5a is the natural ligand for hC5aR and can outcompete binding of LukS on the receptor we next  
321 analyzed whether LukSF formation and disengagement of hC5aR would allow rebinding of C5a on the  
322 receptor. We specifically chose to analyze binding of labeled C5a and not LukS in the presence of  
323 increasing concentrations of LukF. This is because adding labeled LukS to cells coated with LukS (and  
324 then washing) together with LukF will give several possibilities for association: for example, new pores  
325 for free or unoccupied C5aR; intercalation with present bound LukS and lukF in pores; binding to free  
326 or unoccupied C5aR but without pore formation. To detect C5a rebinding at higher LukF  
327 concentrations we used a G130D LukF mutant that interacts with LukS but does not cause cell lysis.  
328 Non lytic activity of this mutant in this assay was confirmed by DAPI staining that showed minimal  
329 cell lysis even at higher concentrations (9% at a 300 nM LukFG130D concentration). At a 300 nM  
330 concentration a significant increase in C5a binding was detected indicating that LukSF dissociates from  
331 hC5aR enabling simultaneous rebinding of an hC5aR interacting ligand (Figure 5c). On the contrary,  
332 addition of the control molecule, Ecb, did not cause increase in C5a binding suggesting that this was

333 due to rebinding of C5a to disengaged hC5aR and not for example because of increase in receptor  
334 expression. This assay showed that C5a can potentially interact with these cells that are attacked by  
335 LukSF. Because C5a is a potent anaphylatoxin that is generated during complement activation and  
336 potentially plays a crucial role in *S. aureus* infections [43] we next analyzed whether LukSF could lead  
337 to complement activation and C5a formation in an *ex vivo* full blood assay. We used soluble C5b-9 as a  
338 marker for terminal complement activation and C5a formation, not C5a, because LukS is known to  
339 compete with C5a for binding to hC5aR on neutrophils [18]. The presence of 200 nM of LukSF clearly  
340 increased formation of soluble C5b-9 compared to full blood without any toxin or only LukS (Figure  
341 5d), indicating that LukSF mediated cell lysis increases C5a formation and potentially also  
342 inflammation in the site of infection.

343

## 344 **DISCUSSION**

345 To determine the stoichiometry of the toxin components without immobilizing the protein on a  
346 surface or within a crystal we implemented our fluorescence imaging method which allows us to  
347 monitor the actual pore formation mechanism within a living cell, including the target receptor crucial  
348 for the complex formation. This kind of study on protein complex formation has not been done before  
349 due primarily to the difficulty of labeling the components and the high native fluorescence background  
350 in mammalian cells. Our covalent labeling strategy and high excitation intensity TIRF microscopy,  
351 combined with advanced image analysis tools, opens the way for further studies into many other pore  
352 forming toxins and processes involving membrane bound protein complex formation.

353 The finding that the toxin complexes are found in receptor clusters indicates that lysis of cells  
354 depends on the local density of close proximity hC5a receptors that will initiate the pore formation



355 process by docking LukS close to the cell membrane such that four hC5aR-LukS dimers (assuming that  
356 one LukS binds only one hC5aR, although hC5aR are randomly clustered on the membrane) can  
357 interact with the free non-bound LukF that will eventually form an octamer (i.e. 4 by 4) and a  
358 functional pore with LukS. These data also suggest that when proper assembly in an octamer is  
359 ongoing/complete, hC5aR will dissociate from the complex and, at the same time, can interact with the  
360 C5a that is formed during complement activation amplified by LukSF-mediated cell lysis itself. This is  
361 logical because, in addition to invading microbes, apoptotic and necrotic cells are known to activate  
362 complement [44]. The triggering of local complement activation by toxin damaged cells and the release  
363 of locally generated C5a (Figure 5) and its interaction with adjacent cells such as endothelial or lung  
364 epithelial cells [45] could explain the mechanism behind the exacerbated inflammation characteristics  
365 exhibited in necrotizing pneumonia. This is an important finding, suggesting that the cause of infection  
366 can dramatically affect the magnitude of the inflammatory response and is highly dependent on the  
367 dynamics of microbial molecules interacting with human receptors. In addition, the disengaged hC5aR  
368 is possibly also available for new toxins to bind, thus allowing the receptor to be recycled and reused  
369 by additional LukS molecules. Our finding that C5a can rebind, doesn't only suggest a mechanism for  
370 exaggerated immune response by LukSF, but also indicates that the dissociated free hC5aR does not  
371 change in conformation due to previous contact with LukS and therefore would also be available for  
372 binding with LukS. We find that roughly half of LukS complexes are immobile prior to LukF binding,  
373 but that LukF binding then results in mostly immobile LukSF complexes. Speculatively, this result may  
374 suggest that LukS binds hC5aR initially and then inserts itself transiently in the membrane  
375 phospholipid bilayer via the exposed hydrophobic residues, following binding of LukF molecules to  
376 LukS. This stable insertion of the LukSF complex into the cell membrane then leads to pore formation  
377 across the whole cell membrane.

378 To characterize the hC5aR interaction with LukSF at a molecular level, we used maleimide-  
379 labeled toxins and HEK cells that expressed only hC5aR and not the second docking target for LukSF,  
380 which are both present on human PMNs [46]. We verified that the interaction between maleimide-  
381 labeled toxin component LukS and the cell surface receptor is required for the target recognition and  
382 cell lysis similarly as shown before for wild type LukS [18] both for human PMNs and hC5aR  
383 expressing HEK cells that were chosen for TIRF imaging because of their stability and ability to form  
384 monolayers on the microscopy cover slip.

385 We observe clusters of pre-established hC5aR in the absence of LukS or LukF, but the addition  
386 of LukS or LukF significantly increased the mean cluster stoichiometry. Fourier spectral analysis  
387 combined with foci overlap modeling suggests that LukS complexes comprise a multimer of 4-5  
388 hC5aR subunits each of which contain 4 LukS molecules, even before addition of LukF. Our findings  
389 are consistent with the hetero-octamer model of 4-plus-4 LukS/LukF subunits [17, 30, 31], however,  
390 our colocalization analysis also indicates the presence of stable complexes of LukS with hC5aR  
391 independent of LukF.

392 By characterizing the mobility of hC5aR and LukS in live cells we find that roughly half of  
393 hC5aR and LukS foci diffuse relatively freely in the cell membrane while the remainder are confined to  
394 zones in the membrane of ~400 nm effective diameter. However, when LukF is present > 90% of LukS  
395 foci become immobile (confined). If LukS were to undergo a conformational change following LukF  
396 binding then this may potentially expose hydrophobic residues that could facilitate insertion of the  
397 toxin into the hydrophobic interior of the phospholipid bilayer. This hypothesis is strongly supported  
398 by the  $\beta$ -barrel prepore-pore formation putative mechanism of  $\gamma$ -hemolysin. Here the residues  
399 responsible for binding with the phospholipid head group are located at the bottom of the rim domain  
400 whereas the stem domain forms an antiparallel  $\beta$ -barrel of which the bottom half comprises the

401 transmembrane portion of the pore [31]. This change from receptor associated LukS to cell membrane  
402 associated LukSF complex can be seen as a change in the proportion of mobile (receptor associated  
403 LukS) and immobile (toxin complexes inserted into cell membrane) foci detected in live cells. GPCRs  
404 similarly are known to have heterogeneous mobility and lateral distribution properties in living cells at  
405 different states for example before and after activation [47].

406           Crystallographic evidence from the monomeric LukF and LukS components and the intact  $\gamma$ -  
407 hemolysin pore suggests that the pore is octameric formed from 4-plus-4 LukF/LukS subunits [30, 48,  
408 49]. Our findings support this octamer model but unlike previous studies also indicate that LukS pre-  
409 forms into a tetramer without LukF and that formation of this tetramer is facilitated by close proximity  
410 C5aR clusters. The presence of LukS tetramers in the absence of LukF cannot be further explained by  
411 our data. It is, however, possible that if LukS molecules would be associated as a tetramer when bound  
412 on the receptor the conformational changes on LukS caused by interactions with LukF should enable  
413 association of the LukF subunits to the complex. According the data presented here this is possible  
414 because in these assays we first enabled LukS to bind on the receptors and eliminated the effect of  
415 freshly formed complexes by free unbound LukS by a washing step before addition of LukF. Each  
416 octamer component consists of cap, rim and stem domains. Here, the cap domain contains the site for  
417 LukS/LukF interaction while the stem domain unfolds and forms the transmembrane  $\beta$ -barrel upon  
418 pore formation. Within crystallization the 2-methyl-2,4-pentanediol (MPD) molecules are bound at the  
419 base of the rim domain, and recognized by Trp177 and Arg198 residues, that may participate in  
420 recognition of the phospholipid bilayer as suggested in a crystal structure of the LukF monomer [50].  
421 In contrast, the structure of the  $\gamma$ -hemolysin suggests a membrane interaction site within residues  
422 Tyr117, Phe119 and Phe139 on the same toxin component [30]. The crystal structure of LukED  
423 determined recently reveals important details of the residues on LukE required for receptor

424 identification [51]. This component corresponds to the receptor binding component LukS on the LukSF  
425 complex, scanning mutagenesis indicating that LukS residues Arg73, Tyr184, Thr244, His245 and  
426 Tyr250, and to a lesser extent Tyr181, Arg242 and Tyr246, are involved in binding to the neutrophil  
427 surface [52].

428         These results suggest that further binding sites for hC5aR on LukS could be possible in addition  
429 to those identified in the LukS rim domain [52]. However, since the binding of LukS to neutrophils is  
430 inhibited by the C5a it is likely that LukS has only one binding site on the receptor [20]. This is also  
431 supported by the similar inhibition profiles of LukS and C5a towards anti-CD88 binding on hC5aR  
432 shown in this study. Therefore, the association of LukS with approximately 4-5 hC5aR molecules could  
433 be explained by the previous suggestion that C5aR forms homo-oligomers in living cells [53]. Our  
434 findings imply that LukSF assembly is dependent on hC5aR cell membrane area density as opposed to  
435 the effective hC5aR concentration when calculated over the whole of a target cell volume, such that  
436 even when hC5aR cellular expression levels are low, for example when inflammatory mediators are  
437 formed to limit the inflammation [34], a cell lysis response may still be achieved through the efficient  
438 targeting of receptor clusters and recycling of the receptor molecules in the cell membrane to be re-  
439 used by free non-bound LukS to get engaged in octamer pore formation. It is possible that  
440 overexpression of hC5aR on HEK cells could lead to an increased ability to form hC5aR foci with  
441 many receptors especially because of intracellular GFP tag although we mitigated this possibility by  
442 cloning the receptor with a monomeric variant of GFP that does not cause GFP dimerization. Other  
443 studies, however, have shown that hC5aR forms clusters of homodimers or heterodimers with the  
444 second C5a receptor C5LR (C5aR2) or other GPCRs like CCR5 especially under high concentrations  
445 of C5a [53-55].

446 Previous *in vitro* studies on LukSF pores formed on human leukocytes and rabbit erythrocytes  
447 have found evidence for both octamers and hexamers, but importantly both suggest a LukS/LukF ratio  
448 of 1:1 [17, 56, 57]. Interestingly we did not observe any correlation to the number of hC5aR present  
449 with LukF incubation time once LukF was already bound to LukS. Moreover, when LukS was  
450 incubated with LukF using sortase-labeled hC5aR cells a significant reduction was observed in the  
451 FRET efficiency signal between LukS and C5aR. It is unlikely that the reduction that was observed in  
452 FRET efficiency would be due to a conformational change because the cysteine mutation used for  
453 maleimide labeling was designed to be exposed on the cap domain of LukS and LukF (Additional file  
454 1: Figure S1) that in light of the structural data undergoes minimal or no conformational changes  
455 during complex assembly [31]. Since our biochemical assays indicate that LukF does not bind directly  
456 to hC5aR expressing cells and, that binding of LukF to LukS results in an increased distance between  
457 the receptor and the complex, this suggests that LukF binding to LukS results in LukS dissociating  
458 from the receptor, released as a newly formed LukSF complex.

459 We cannot directly determine the cause of this behavior in our present study, however one  
460 explanation may lie in the conformational change during the prepore-to-pore transition that has been  
461 shown to occur on  $\gamma$ -hemolysin complexes subsequently after binding of LukF to LukS [30, 31].  
462 Interestingly, this same study shows that during the pre-pore state the space for the transmembrane  
463 region is occupied by the rim domain of the adjacent octamer in a LukSF crystal. One explanation for  
464 these observations, that remains to be explored, is that in addition to the stem domain the residues  
465 within the rim domain that interact with the receptor might also have different orientations in the pre-  
466 pore state when compared to the pore state. In addition to using the maleimide labeled mLukF and  
467 mLukS and fluorescence microscopy the putative dissociation of the hC5aR from the LukSF complex  
468 was further verified by using the wild type LukS and LukF proteins in an assay where LukS-coated

469 hC5aR cells were incubated with increasing concentrations of LukF. Here, increase in anti-CD88  
470 binding also clearly indicates LukSF dissociation. In all of the assays where we could observe 20-30%  
471 receptor dissociation we used sublytic concentrations of LukF to be able to measure healthy cells with  
472 normal membrane fluidity and natural behavior rather than dead cells. This kind of receptor  
473 disengagement has been shown before by at least the cytotoxin intermedilysin which interacts with a  
474 GPI-anchored complement regulatory molecule on the cell membrane [58]. Moreover, dissociation of  
475 LukSF complex is also supported by electron microscopy of LukSF on human leukocyte membrane  
476 fragments. Here, the ring-shaped oligomers with outer and inner diameters of 9 nm and 3 nm were  
477 shown without a receptor [57].

478         In this study we also show, for the first time to our knowledge, that the dissociated receptor can  
479 be reused by free unbound C5a. This indicates that LukS binding on the receptor does not change  
480 receptor conformation and thereby can putatively also be reused by additional LukS. In our full blood  
481 model we observed that LukSF mediated cell lysis clearly increased complement activation and C5a  
482 formation. The increase in C5a concentration in the site of infection could potentially limit the  
483 availability of hC5aR for LukS molecules on neutrophils and thereby reduce lytic activity of the toxin  
484 as C5a has previously been shown to reduce LukSF mediated lysis *in vitro* [18]. Rebinding of C5a on  
485 the receptor may therefore indicate that in natural settings where all components (i.e. LukS, LukF and  
486 C5a) are present C5a can outcompete binding of LukSF on the target cells. Therefore, recycling of the  
487 receptor could be one strategy for the toxin to ensure that a sufficient number of pores will damage the  
488 cells especially when limited number of receptors are available.

489         There are several steps on the leukocidin complex assembly that may be critical for the function  
490 of the toxin. Based on our observations we provide new information on leukocidin-receptor interactions  
491 and propose two additional stages to the processes of pore formation and the mechanism by which

492 LukSF potentially induces inflammation (Figure 6a). Stage 1 is the binding of LukS to hC5aR clusters.  
493 The first step in this process is the target recognition of LukS binding to the membrane receptor. We  
494 detected LukS-hC5aR complexes on clusters of receptors indicating that pore formation takes place in  
495 these clusters. Stage 2 is the binding of 4 LukF molecules to 4 LukS molecules resulting in a hetero-  
496 octamer LukSF nanopore in the neutrophil cell membrane. Stage 3 is then the dissociation of the  
497 receptors from the LukSF complex enabling the receptor to be reused for subsequent binding free  
498 unbound ligand to generate more nanopores in the cell membrane and enhance the damage to the  
499 neutrophil. We measured a correlation between the number of LukS and hC5aR molecules present in  
500 LukS-hC5aR complexes, but with no obvious correlation between the number of LukF and hC5aR  
501 molecules when LukF was added to the LukS-hC5aR complex. In addition to previous studies [14] we  
502 suggest that LukSF-mediated cell lysis and dissociation from hC5aR can potentially amplify *S. aureus*  
503 mediated inflammation in the site of infection (Figure 6). The direct lysis of neutrophils is enhanced by  
504 newly formed LukSF complexes that are formed on the cell membrane hC5aR via reattachment of new  
505 LukS. Neutrophil lysis activates the complement system and the newly generated C5a induces  
506 cytokine/chemokine production and neutrophil chemotaxis via the C5a/C5aR signaling pathway on  
507 adjacent cells. Furthermore, the increased vasodilation and vascular permeability (Figure 6b) leads to  
508 massive neutrophil accumulation and tissue injury at the site of bacterial infection [59].

## 509 **CONCLUSIONS**

510 In summary, our findings that the receptors of targeted host cells dissociate rapidly from the  
511 leukocidin complex upon formation of a harmful toxin pore, freeing up mobile receptor ‘seeds’ that can  
512 diffuse to other parts of the cell membrane, suggest a hitherto undiscovered strategy used by microbes  
513 to kill human immune cells. This enables a limited number of receptors to be recycled as docking for  
514 the leukocidin or potentially the anaphylatoxin C5a to ensure that enough pores will form to damage

515 the host cell and simultaneously maintain or possibly amplify the inflammation in the site of infection.  
516 This discovery may generalize to other bi-component toxins which employ a similar docking receptor  
517 like the C5aR receptor, including the family of *Staphylococcal* bi-component leukocidins of  
518 HlgC/HlgB, HlgA/HlgB, LukE/LukD (CXCR1, CXCR2, CCR5), and LukM/LukF' for bovine CCR2.  
519 These results highlight the importance of leukocidin-receptor interactions in pore formation and may  
520 facilitate further understanding in the role of pore-forming toxins in *S. aureus* infections. This new  
521 mechanistic insight may prove valuable to the development of future antibacterial and anti-  
522 inflammatory therapies, especially important in light of the growing menace of global antimicrobial  
523 resistance.

## 524 **MATERIALS AND METHODS**

### 525 **Experimental model and subject details**

526 ***PMN isolation, Cell Lines, and Transfections.*** Human blood was obtained from healthy volunteers  
527 and the polymorphonuclear (PMN) cells were isolated by Ficoll/Histopaque centrifugation [60].  
528 Informed consent was obtained from all subjects, in accordance with the Declaration of Helsinki and  
529 the Medical Ethics Committee of the University Medical Center Utrecht (METC-protocol 07-125/C  
530 approved 1 March 2010). To ensure a truly monomeric state and prevent GFP mediated clustering of  
531 the receptor, a fusion construct of hC5aR with the monomeric GFP variant mGFP with A206K  
532 mutation (also denoted GFPmut3) [61, 62] was made at the C-terminus (primers used listed in Table 2)  
533 or a sortase A LPXTGG sequence was made in the N-terminus and cloned into pIRESpuro vectors  
534 (Table 2) by PCR. The amplification reaction was performed in three separate amplification steps using  
535 overlap extension PCR on hC5aR and mGFP templates. hC5aR (Accession number of human C5aR =  
536 NM\_00173) was used as the template using enzymes and purification kits as described above. The



537 clones were ligated into the vectors and transferred into TOP10 *E. coli* competent cells, then amplified  
538 and sequenced similarly to the toxin clones described previously. The pIRESpuro/hC5aR-mGFP vector  
539 was transfected into Human Embryonic Kidney (HEK) 293T cells (a HEK cell line, Invitrogen), stably  
540 expressing G protein G $\alpha$ 16, using Lipofectamine-2000 Reagent according to manufacturer's  
541 instructions (Thermo Fisher Scientific). After 24–48 hr, transfected cells were harvested with 0.05%  
542 trypsin. To obtain a uniform, stable culture, cells were sub-cloned in a concentration of 0.5 cells/well in  
543 a 96-well plate in Dulbecco's modified Eagle's medium (DMEM, Lonza) supplemented with 10% fetal  
544 calf serum (Invitrogen) 100 U/ml penicillin/ 100  $\mu$ g/ml streptomycin (PS; Invitrogen), 1  $\mu$ g/ml  
545 Hygromycin and 250  $\mu$ g/ml Puromycin. For N-terminal labelling of the sortase A recognition sequence  
546 containing HEK cells with FITC were successfully performed in two steps as described previously  
547 [63]. The expression of hC5aR was analyzed by incubating the cells in 50  $\mu$ l RPMI (Invitrogen)  
548 supplemented with 0.05% human serum albumin (Sanquin), RPMI-HSA, at  $5 \times 10^6$  cell/ml  
549 concentration for 45 min with PE-conjugated anti-CD88 and detected by flow cytometry. The presence  
550 of mGFP or FITC-LPXTG was detected directly by flow cytometry.

551 ***Recombinant Protein Production and Purification.*** Polyhistidine-tagged LukS and LukF were cloned  
552 and expressed using an *E. coli* expression system. For maleimide-based labeling a single-cysteine  
553 mutation was designed to the LukS and LukF components based on previous data and the crystal  
554 structure of the octameric pore [30]. An additional mutation Y113H was included in LukS to facilitate  
555 oligomerization of the maleimide-labeled protein [17]. The target genes were amplified by PCR (Table  
556 2) from the wild type sequences using Phusion High-Fidelity DNA polymerase (Thermo Scientific)  
557 [18]. The PCR product was cloned into a slightly modified pRSET expression vector (Invitrogen),  
558 resulting in expression of proteins with an N-terminal 6xHIS-tag. For LukF mutant G130D we used a  
559 gBlock (custom dsDNA sequence via Integrated DNA Technologies) to incorporate the LukF in the

560 pRSET vector. Clones were sequenced to verify the correct sequence. The recombinant proteins were  
561 expressed in Rosetta Gami (DE3) pLysS *E. coli* using 1mM IPTG induction and isolated by a native  
562 isolation method. The expressed proteins were purified according to the manufacturer's instructions  
563 (Invitrogen) using 1 ml Nickel HisTrap and Superdex 75 HiLoad columns (GE Health Care Life  
564 Sciences). Toxin components were labeled with either Cy3 (GE Healthcare), Alexa Fluor® 594 or  
565 Alexa Fluor® 647 C<sub>2</sub> Maleimide reagent according to the manufacturer's instructions (Thermo  
566 Scientific) resulting in negligible unlabeled content. The labeling efficiency was 100% as determined  
567 by protein concentrations using absorption at A280 and dye concentrations using absorption at A650 by  
568 a Nanodrop ND-1000 Spectrophotometer.

569

## 570 **Method details**

571 **Binding Assays.** Binding of the maleimide-labeled proteins to PMN and HEK cells was confirmed by  
572 flow cytometry. LukS-K281C-Y113H (mLukS) or wild type, LukS (wt) was labeled with FITC or  
573 Alexa Fluor maleimide 647 or 594. For competition assays 3 µg/ml of the labeled protein and  
574 increasing concentration of non-labeled mLukS or LukS(wt) was incubated with isolated PMNs or  
575 HEK hC5aR-mGFP cells ( $5 \times 10^6$  cell/ml) in a total volume of 50 µl RPMI-HSA on ice. For binding  
576 assays without competition the cells were incubated with increasing concentration of mLukF\*. After  
577 30 min incubation on ice, cells were washed, fixed with 1% paraformaldehyde and analyzed by flow  
578 cytometry. HEK cells transfected with CCR2 receptor were used as negative control for mLukS  
579 binding. To see inhibition of PE anti-CD88 (BD biosciences) binding by LukS(wt) or C5a hC5aR  
580 expressing HEK cells were first incubated with increasing concentrations of LukS or C5a for 45 min at  
581 4°C. Then 2 µl of anti-CD88/200,000 cells was added and incubated as previously. Cells were washed

582 once with RPMI-HSA, fixed with 1% paraformaldehyde and analyzed by flow cytometry. To detect  
583 hC5aR dissociation using sublytic concentrations of LukSF hC5aR expressing HEK cells were  
584 incubated with 100 nM of wild type LukS for 45 min at 4°C. After washing the unbound LukS sublytic  
585 concentrations of wild type LukF was added to the cells and incubated for 20 min at 37°C and 5% CO<sub>2</sub>  
586 atmosphere. Percentages of lysed vs. non lysed cells were measured by using 1 µg/ml of DAPI in the  
587 reaction. For C5a rebinding assay 1 µM of C5a (Sigma) was labeled with NT-647 according to  
588 manufacturer's instructions (Monolith NT™). Free label from the sample was removed by three times  
589 centrifugation through Amicon Ultra 0.5 mL centrifugal filters (Sigma). The hC5aR expressing HEK  
590 cells were incubated with 1 µM of wild type LukS for 45 min at 4°C. After washing 20 nM of NT647-  
591 C5a and increasing concentrations of wild type LukF was added to the cells and incubated for 20 min at  
592 37°C and 5% CO<sub>2</sub> atmosphere. Cells were washed once with RPMI-HSA, fixed with 1%  
593 paraformaldehyde and analyzed by flow cytometry. Percentages of lysed vs. non lysed cells were  
594 measured by using 1 µg/ml of DAPI in the reaction. *S. aureus* Ecb (extracellular complement binding  
595 protein) was used as negative control as it interacts with another cell surface receptor, CR1 [64]. Flow  
596 cytometry data were analyzed using FlowJo v10 software package.

597 **Cell Permeability Assays.** Isolated PMNs or HEK hC5aR-mGFP cells ( $5 \times 10^6$  cell/ml) were exposed to  
598 labeled and unlabeled mixtures as appropriate of mLukF/mLukS recombinant proteins at equimolar  
599 concentrations in a volume of 50 µl RPMI-HSA with 1 µg/ml of DAPI. Cells were incubated for  
600 30 min at 37°C with 5% CO<sub>2</sub> and subsequently analyzed by flow cytometry. To calculate the lysis time  
601 cells were first incubated with 150 nM of mLukS for 15 min. Then 600 nM of mLukF was added and  
602 immediately subjected to flow cytometry analysis where the permeability was measured at several time  
603 points. Cell lysis was defined as intracellular staining by DAPI. HEK cells transfected with human

604 CCR2 receptor was used as negative control for toxin-mediated lysis. Statistical differences between  
605 means of repeated experiments were calculated using two-tailed Student *t*-tests.

606 ***Ex vivo complement activation assay.*** To maintain complement activity the blood samples were  
607 anticoagulated with lepirudin (Refludan, Schering, Berlin, Germany). Increasing concentrations of  
608 LukSF or LukS (0 to 2000 nM) was incubated in full blood for 30 min at 37°C under continuous  
609 rotation (300 rpm). Complement activity was stopped by adding 10 mM EDTA in the suspension and  
610 the plasma was separated from the blood cells by centrifugation at 5000 × g. A 1:30 dilution of each  
611 plasma sample was analyzed by SC5b 9 Enzyme Immunoassay according to manufacturer's  
612 instructions (MicroVue SC5b 9 Plus Enzyme Immunoassay, Quidel). One *S. aureus* colony (1 × 10<sup>8</sup>  
613 cells) was used as a positive control for SC5b-9 formation. The bacteria were grown over night on  
614 blood agar plate at 37°C 5% CO<sub>2</sub> atmosphere.

615 ***Fluorescence microscopy.*** Cells were imaged using a Nikon A1R/STORM microscope utilizing a x100  
616 NA oil immersion Nikon TIRF objective lens. We used a total internal reflection fluorescence (TIRF)  
617 microscopy module. We used laser excitation at wavelengths 488 nm (for mGFP), 561 nm (for  
618 Alexa594) and 647 nm (for Alexa647) from a commercial multi laser unit fiber-coupled into the  
619 microscope, capable of delivering maximum power outputs up to ~200 mW, with a depth of  
620 penetration in the range ~100-130 nm for the TIRF excitation evanescent field. Fluorescent images  
621 acquired on an iXon+ 512 EMCCD camera detector (Andor) at a magnification of 150nm/pixel. Green  
622 and red channel images were obtained by imaging through separate GFP or Alexa647 filter sets. For  
623 high laser excitation intensity single-molecule millisecond imaging, green channel images to determine  
624 mGFP localization were acquired continuously using 488 nm wavelength laser excitation over a period  
625 of ~5 min through a GFP filter set, then the filter set was manually switched to Alexa647 as for red  
626 channel images acquisition continuously using 647 nm wavelength laser excitation until complete

627 photobleaching of the sample after 1-2 min. For photobleaching laser powers ranged between 15 mW  
628 (Alexa 647) to 100 mW (mGFP). For fixed cell analysis cells were either incubated first with mLukS or  
629 mLukS\*, washed and incubated with mLukF or mLukF\*, or incubated first just with mLukS\* with  
630 mLukF\* absent, then washed and fixed with 1% paraformaldehyde.

631 For fluorescence imaging the HEK cells were grown on 0.1% poly-L-lysine which coated  
632 8-well chambered cover glass slides (Ibidi) in standard growth conditions described above. To analyze  
633 the deposition of mLukS\* on live cells the cells were first imaged in PBS buffer in the absence of  
634 toxin. Here, a  $256 \times 256$  pixel area covered approximately one cell per field of view. Then the cells  
635 were incubated for 2 min with 5  $\mu\text{g/ml}$  of Alexa594 maleimide-labeled LukS in RPMI-HSA and the  
636 cells were carefully washed with PBS keeping the imaging area and focus constant. Because of the fast  
637 bleaching of the Alexa647 label a more stable Alexa594 label was used for the LukS deposition  
638 imaging. The deposition of mLukS was detected for 10 min and the lysis of the cell was recorded for  
639 15 min after addition of 600 nM of unlabeled mLukF. Cells were imaged in TIRF at 50 ms per frame  
640 with the laser automatically switched between 488 nm/0.22 mW, 647 nm/3 mW and 561 nm/3 mW or  
641 488 nm/0.22 mW and 561 nm/3 mW (Figure 2).

642 ***FRET experiments.*** The Cy3-labeled LukS or non-labeled LukS and Cy3-labeled LukF or non-labeled  
643 LukF or Cy-labeled LukF and controls (only FITC-labeled cells or unlabeled cells with only Cy3-  
644 labeled LukS) were incubated at 4°C for 30 min and then 10 min at 37°C, washed 2 x with RPMI-HSA  
645 and fixed as before. The cells were in PBS during imaging. FITC experiments were performed using  
646 Leica TCS SP5 microscope, using a 62 $\times$  oil immersion objective lens, and FRET Sensitized Emission  
647 Wizard in Leica Application Suite Advanced Fluorescence (LAS AF). Images were acquired using  
648 488 nm and 543 nm wavelength lasers and a laser power of 27% 12.0 (A.U.) and a scan size of  
649  $512 \times 512$ , 800 ms, 50 ms per frame, beam splitter TD 488/543/633.

650 FRET efficiency  $\varepsilon$  was calculated using the donor, directly excited acceptor and donor excited  
651 acceptor intensity from n=5-10 manual regions of interest inside cells for each experiment, using the  
652 following formula [65]:

$$\varepsilon = \frac{\beta(B - D) - \gamma A}{A}$$

653 B = Intensity signal, donor excited acceptor

654 D = Intensity signal, donor

655 A = Intensity Signal, directly excited acceptor

656  $\beta$  = calibration for ratio of measured intensities of  $B_{\text{donor channel}}/A_{\text{donor channel}}$

657  $\gamma$  = calibration for ratio of measured intensities of  $B_{\text{acceptor channel}}/A_{\text{acceptor channel}}$

658

659 ***Single-molecule imaging of live and fixed cells.*** GFP and Alexa647 fluorescence micrograph time  
660 series of fixed and live cells were sampled taken at 20 ms per frame. Green channel images were  
661 acquired continuously using 488 nm wavelength laser excitation over a period of *ca.* 5 min via the GFP  
662 filter set. Then the filter set was manually switched to that for Alexa647 and red channel images were  
663 acquired continuously using 647 nm wavelength laser excitation until complete photobleaching of  
664 the sample after 1-2 min. The step-wise single-molecule fluorescence photobleaching was analyzed  
665 both for live and fixed cells. For live cell photobleaching analysis the cells were incubated with 150 nM  
666 of labeled or unlabeled mLukS as required for *ca.* 15 min. After washing with PBS, 600 nM of labeled  
667 or unlabeled mLukF was added and the imaging was done immediately within 10-15 min. If labeled  
668 LukF was added the wells were washed with PBS before analysis. Also samples with only LukS and  
669 without toxins were analyzed. For fixed cell analysis the cells were incubated first with mLukS or  
670 mLukS\* for 30 min at +4°C in RPMI-HSA, washed with same buffer and incubated for 10 min at 37°C

671 with mLukF or mLukF\*, or the same protocol was followed but using mLukS\* alone with mLukF\*  
672 absent. Then the cells were washed and fixed with 1% paraformaldehyde. 1M mercaptoethylamine  
673 (MEA) buffer was used for fixed cell analysis. Photobleaching of recombinant mGFP and mLukS-  
674 Alexa647 were also separately analyzed in a tunnel slide comprising two pieces of double-sided tape  
675 forming a channel sandwiched between a standard glass microscope slide and a plasma cleaned  
676 coverslip. Proteins solutions (1 $\mu$ g/ml) were immobilized onto the coverslip coated by anti-GFP or anti-  
677 His antibodies respectively with phosphate buffered saline washes in between.

## 678 **Quantification and statistical analysis**

679 ***Binding and permeability assays.*** Statistical significance between repeated (n>1) experiments was  
680 analyzed using two-tailed Student's *t*-tests where using a standard p-value threshold of <0.05 as  
681 indicating statistical significance. Means and standard deviations of repeated experiments are shown in  
682 error bars, unless indicated otherwise.

683 ***Image analysis.*** Basic image extraction, cropping and quantification was done using NIS-Elements  
684 microscope imaging software and Image J. More advanced foci tracking was done using bespoke  
685 software written in MATLAB (Mathworks) [36] which enabled automatic detection and localization of  
686 individual fluorescent foci to within 40 nm lateral precision (Additional file 2: Figure S2a). The  
687 software identifies candidate foci by a combination of pixel intensity thresholding and image  
688 transformation. The intensity centroid and characteristic intensity, defined as the sum of the pixel  
689 intensities inside a 5-pixel radius circular region of interest around the foci intensity centroid minus the  
690 local background and corrected for non-uniformity in the excitation field are determined by repeated  
691 Gaussian masking. If the signal-to-noise ratio of a foci (the intensity per pixel/background standard  
692 deviation per pixel) is greater than a pre-set threshold, nominally here set at 0.4 based on prior  
693 simulations, it is accepted and fitted with a 2D radial Gaussian function to determine its width. Foci in

694 consecutive frames within a single PSF width, and not different in intensity or width by greater than a  
695 factor of two, are linked into the same track.

696 Foci intensity was used to quantify stoichiometry information. As foci photobleach over time  
697 during continuous laser excitation their intensity falls in a stepwise manner due to photobleaching of an  
698 integer number of fluorophore tags in each sampling time window. By quantifying the size of a single  
699 step, the characteristic intensity of a single fluorophore can be obtained and thus the stoichiometry of  
700 the foci from its initial intensity. The step size is found from the periodicity in the distribution of foci  
701 intensities corroborated by the pairwise distance (PwD) distribution of these intensities and the Fourier  
702 spectrum of the PwD which contains peaks at the characteristic intensity and harmonics at multiples of  
703 this value (Additional file: Figure S2d-e).

704 Here, the copy number of hC5aR-mGFP was comparatively high such that the TIRF images  
705 were initially saturated in regards to pixel intensity output. After ~20 s of photobleaching the non-  
706 saturated foci intensity values were fitted by an exponential function which characterized the rate of  
707 intensity decay, equivalent to an exponential photobleach time of ~20 s, and extrapolated back to zero  
708 time to determine the initial foci intensity (Additional file: Figure S2f). The Alexa647 dye also  
709 bleached during 647 nm wavelength laser excitation but images were not initially saturated, but also in  
710 some images which were exposed to the 488nm laser and then the 647nm laser, also bleached by the  
711 488 nm wavelength laser. In these images a fixed correction factor of 6x, determined by comparing to  
712 images exposed to the 647 nm laser first, was used. The stoichiometry of each foci was then  
713 determined as the initial intensity divided by the intensity of the appropriate single fluorescent dye tag  
714 (i.e. either mGFP or Alexa647 in this case).



715 We characterized the mobility of tracked foci by calculating their MSD as a function of time  
716 interval ( $\tau$ ). For each detected foci the MSD was calculated from the measured intensity centroid  
717  $(x(t), y(t))$  at time  $t$  assuming a foci track of  $N$  consecutive image frames at a time interval  $\tau = n\Delta t$  where  
718  $n$  is a positive integer and  $\Delta t$  is the frame integration time (here 20 ms):

$$\begin{aligned} MSD(\tau) = MSD(n\Delta t) &= \frac{1}{N-1-n} \sum_{i=1}^{N-1-n} \left( (x(i\Delta t + n\Delta t) - x(i\Delta t))^2 + (y(i\Delta t + n\Delta t) - y(i\Delta t))^2 \right) \\ &= 4D\tau + 4\sigma^2 \end{aligned}$$

719

720 The lateral ( $xy$ ) localization precision is given by  $\sigma$  which we determine to be 40 nm. We fitted a  
721 straight line to each separate MSD relation. Assuming a line fit has an optimized gradient  $g$  to the first  
722 4 points (defined as the first 3 measured MSD data points for  $n=1, 2$  and 3, in addition to a 4<sup>th</sup> data  
723 corresponding to  $n=0$  obtained from constraining the intercept be  $4\sigma^2$  to within measurement error of  
724 the localization precision) then estimated the microscopic diffusion coefficient  $D$  as  $g/4.\Delta t$ . For  
725 immobile foci, tracks were collated and compiled to generate a mean MSD vs.  $\tau$  relation which was  
726 fitted to an asymptotic rising exponential function as an analytical model for confined diffusion of  
727 MSD plateau equal to  $L^2/6$  where  $L$  is the effective confinement diameter [42], enabling us to estimate  
728 the confinement diameter.

729 **Colocalization analysis.** The extent of colocalization between red and green detected foci was  
730 determined using a method which calculated the overlap integral between each green and red foci pair,  
731 whose centroids were within  $\sim 1$  PSF width ( $\sim 3$  pixels). Assuming two normalized, two-dimensional  
732 Gaussian intensity distributions  $g_1$  and  $g_2$ , for green and red foci respectively, centred around  $(x_1, y_1)$

733 with sigma width  $\sigma_1$ , and around  $(x_2, y_2)$  with width  $\sigma_2$ , the overlap integral  $v$  is analytically determined  
734 as:

$$v = e^{(-\Delta r^2/2(\sigma_1^2 + \sigma_2^2))}$$

735

736 Where:

$$\Delta r^2 = (x_1 - x_2)^2 + (y_1 - y_2)^2$$

737

738

739 We use a criterion of an overlap integral of 0.75 or above to indicate putative colocalization  
740 [41] since this corresponds to a foci centroid separation equivalent to the localization precision in this  
741 case. By quantifying the standard deviation on the number of detected foci in each channel we estimate  
742 that the standard error of colocalisation proportion under our typical imaging conditions is  
743 approximately 9%.

744 **Random foci overlap models.** We calculated the probability of foci overlap in a single color channel by  
745 first estimating a sensible range of foci surface density  $n$ . For the lower limit we used the number of  
746 foci tracks detected in a 20 image frame time window, for the upper limit we used the average  
747 measured value of the background-corrected pixel intensity value divided by the intensity of a single  
748 fluorophore (equivalent to  $\sim 1$  mLUK<sup>\*</sup> molecule per pixel). We implemented these probability  
749 estimates into a surface density model which assumed a random Poisson distribution for nearest-  
750 neighbor separation [40, 41, 66-69]. This model indicates that the probability that a nearest-neighbor

751 separation is greater than  $w$  is given by  $\exp(-\pi w^2 n)$ . The probability of overlap for each density  
752 estimate (Additional file 4: Figure S4) was convolved with a real molecular stoichiometry distribution  
753 and a Gaussian function  $p(x)$  of stoichiometry ( $x$ ):

$$p(x) = 2\pi\sigma^2 \exp\left(-\frac{(x - n)^2}{2\sigma^2\sqrt{n}}\right)$$

754 where  $\sigma$  is the width of single fluorophore intensity distribution ( $\sim 0.7$  molecules), and  $n$  is the real  
755 molecular stoichiometry. The tetramer model assumes  $n=4$ , then all higher order stoichiometries are  
756 due to overlapping PSFs. The tetramer oligomer molecule assumed an equal number of multimerized  
757 tetramers up to 5, which gave the best fit to the data.

758 The same strategy was used to model the random overlap probability for green and red color  
759 channel fluorescent foci in dual color imaging experiments to assess the extent of apparent  
760 colocalization due to random overlap between hC5aR and mLukS\*/F\*. The probability that a nearest-  
761 neighbor separation is greater than  $w$  for foci of two different types is the same as a single type  
762 multiplied by  $2/3$ . (38)

## 763 **Software**

764 All our bespoke software developed is freely and openly accessible  
765 via <https://sourceforge.net/projects/york-biophysics/> (65).

## 766 **Statistical tests and replicates**

767 All statistical tests used are two-tailed unless stated otherwise. For single-molecule TIRF imaging each  
768 cell can be defined as a biological replicate sampled from the cell population. We chose sample sizes of  
769 5-7 cells yielding thousands of foci, generating reasonable estimates for stoichiometry and diffusion

770 coefficient distributions. Technical replicates are not possible with the irreversible photobleaching  
771 assay.

772

773 **Ethics statement**

774 Human polymorphonuclear (PMN) cells, obtained from healthy volunteers were isolated by  
775 Ficoll/Histopaque centrifugation [60]. Informed written consent was obtained from all subjects, in  
776 accordance with the Declaration of Helsinki and the Medical Ethics Committee of the University  
777 Medical Center Utrecht (METC-protocol 07-125/C approved 1 March 2010).

778

779

780 **Acknowledgments**

781 We thank Piet Aerts and Angelino Tromp for assistance in sample preparation and labeling and Esther  
782 van 't Veld and Richard Wubbolts (Utrecht) for assistance with light microscopy and Dr Karin Strijbis  
783 (Veterinary School, UU) providing the sortase A enzyme. This work was supported by The Finnish  
784 Cultural Foundation (grants 00131060 and 00142390), the Biological Physical Sciences Institute,  
785 Royal Society, MRC (grant MR/K01580X/1), BBSRC (grant BB/N006453/1), the EPSRC Physics of  
786 Life UK network and the Wellcome Trust [ref: 204829] through the Centre for Future Health (CFH) at  
787 the University of York, UK.

788

789 **Conflict of interest**

790 All the authors declare that they have no conflict of interests.

791

792 **References**

- 793 1. DeLeo FR, Otto M, Kreiswirth BN, Chambers HF. Community-associated methicillin-resistant  
794 *Staphylococcus aureus*. *Lancet*. 2010;375(9725):1557-68.
- 795 2. Barrett FF, McGehee RF, Jr., Finland M. Methicillin-resistant *Staphylococcus aureus* at Boston  
796 City Hospital. Bacteriologic and epidemiologic observations. *N Engl J Med*. 1968;279(9):441-8.
- 797 3. Udo EE, Pearman JW, Grubb WB. Genetic analysis of community isolates of methicillin-  
798 resistant *Staphylococcus aureus* in Western Australia. *J Hosp Infect*. 1993;25(2):97-108.

- 799 4. Vandenesch F, Naimi T, Enright MC, Lina G, Nimmo GR, Heffernan H, et al. Community-  
800 acquired methicillin-resistant *Staphylococcus aureus* carrying Panton-Valentine leukocidin genes:  
801 worldwide emergence. *Emerg Infect Dis.* 2003;9(8):978-84.
- 802 5. Hiramatsu K, Aritaka N, Hanaki H, Kawasaki S, Hosoda Y, Hori S, et al. Dissemination in  
803 Japanese hospitals of strains of *Staphylococcus aureus* heterogeneously resistant to vancomycin.  
804 *Lancet.* 1997;350(9092):1670-3.
- 805 6. Koch G, Yepes A, Forstner KU, Wermser C, Stengel ST, Modamio J, et al. Evolution of  
806 resistance to a last-resort antibiotic in *Staphylococcus aureus* via bacterial competition. *Cell.*  
807 2014;158(5):1060-71.
- 808 7. Meyer F, Girardot R, Piemont Y, Prevost G, Colin DA. Analysis of the specificity of Panton-  
809 Valentine leukocidin and gamma-hemolysin F component binding. *Infect Immun.* 2009;77(1):266-73.
- 810 8. Gauduchon V, Werner S, Prevost G, Monteil H, Colin DA. Flow cytometric determination of  
811 Panton-Valentine leukocidin S component binding. *Infect Immun.* 2001;69(4):2390-5.
- 812 9. Otter JA, French GL. Molecular epidemiology of community-associated methicillin-resistant  
813 *Staphylococcus aureus* in Europe. *Lancet Infect Dis.* 2010;10(4):227-39.
- 814 10. Naimi TS, LeDell KH, Como-Sabetti K, Borchardt SM, Boxrud DJ, Etienne J, et al.  
815 Comparison of community- and health care-associated methicillin-resistant *Staphylococcus aureus*  
816 infection. *JAMA.* 2003;290(22):2976-84.
- 817 11. Lina G, Piemont Y, Godail-Gamot F, Bes M, Peter MO, Gauduchon V, et al. Involvement of  
818 Panton-Valentine leukocidin-producing *Staphylococcus aureus* in primary skin infections and  
819 pneumonia. *Clin Infect Dis.* 1999;29(5):1128-32.
- 820 12. Gillet Y, Issartel B, Vanhems P, Fournet JC, Lina G, Bes M, et al. Association between  
821 *Staphylococcus aureus* strains carrying gene for Panton-Valentine leukocidin and highly lethal  
822 necrotising pneumonia in young immunocompetent patients. *Lancet.* 2002;359(9308):753-9.

- 823 13. Perret M, Badiou C, Lina G, Burbaud S, Benito Y, Bes M, et al. Cross-talk between  
824 *Staphylococcus aureus* leukocidins-intoxicated macrophages and lung epithelial cells triggers  
825 chemokine secretion in an inflammasome-dependent manner. *Cellular microbiology*. 2012;14(7):1019-  
826 36.
- 827 14. Diep BA, Chan L, Tattevin P, Kajikawa O, Martin TR, Basuino L, et al. Polymorphonuclear  
828 leukocytes mediate *Staphylococcus aureus* Panton-Valentine leukocidin-induced lung inflammation  
829 and injury. *Proc Natl Acad Sci U S A*. 2010;107(12):5587-92.
- 830 15. Jayasinghe L, Bayley H. The leukocidin pore: evidence for an octamer with four LukF subunits  
831 and four LukS subunits alternating around a central axis. *Protein Sci*. 2005;14(10):2550-61.
- 832 16. Colin DA, Mazurier I, Sire S, Finck-Barbancon V. Interaction of the two components of  
833 leukocidin from *Staphylococcus aureus* with human polymorphonuclear leukocyte membranes:  
834 sequential binding and subsequent activation. *Infect Immun*. 1994;62(8):3184-8.
- 835 17. Das SK, Darshi M, Cheley S, Wallace MI, Bayley H. Membrane protein stoichiometry  
836 determined from the step-wise photobleaching of dye-labelled subunits. *Chembiochem*. 2007;8(9):994-  
837 9.
- 838 18. Spaan AN, Henry T, van Rooijen WJ, Perret M, Badiou C, Aerts PC, et al. The staphylococcal  
839 toxin Panton-Valentine Leukocidin targets human C5a receptors. *Cell host & microbe*. 2013;13(5):584-  
840 94.
- 841 19. Postma B, Kleibeuker W, Poppelier MJ, Boonstra M, Van Kessel KP, Van Strijp JA, et al.  
842 Residues 10-18 within the C5a receptor N terminus compose a binding domain for chemotaxis  
843 inhibitory protein of *Staphylococcus aureus*. *J Biol Chem*. 2005;280(3):2020-7.
- 844 20. Spaan AN, Schiepers A, de Haas CJ, van Hooijdonk DD, Badiou C, Contamin H, et al.  
845 Differential Interaction of the Staphylococcal Toxins Panton-Valentine Leukocidin and gamma-  
846 Hemolysin CB with Human C5a Receptors. *J Immunol*. 2015;195(3):1034-43.

- 847 21. Walport MJ. Complement. First of two parts. *N Engl J Med*. 2001;344(14):1058-66.
- 848 22. Fearon DT, Austen KF. Activation of the alternative complement pathway with rabbit  
849 erythrocytes by circumvention of the regulatory action of endogenous control proteins. *The Journal of*  
850 *experimental medicine*. 1977;146(1):22-33.
- 851 23. Berends ET, Mohan S, Miellel WR, Ruyken M, Rooijackers SH. Contribution of the  
852 complement Membrane Attack Complex to the bactericidal activity of human serum. *Molecular*  
853 *immunology*. 2015;65(2):328-35.
- 854 24. Easmon CS, Glynn AA. Comparison of subcutaneous and intraperitoneal staphylococcal  
855 infections in normal and complement-deficient mice. *Infection and immunity*. 1976;13(2):399-406.
- 856 25. Mullaly SC, Kubes P. The role of TLR2 in vivo following challenge with *Staphylococcus*  
857 *aureus* and prototypic ligands. *J Immunol*. 2006;177(11):8154-63.
- 858 26. Woodruff TM, Nandakumar KS, Tedesco F. Inhibiting the C5-C5a receptor axis. *Mol Immunol*.  
859 2011;48(14):1631-42.
- 860 27. Ricklin D, Lambris JD. Progress and Trends in Complement Therapeutics. *Adv Exp Med Biol*.  
861 2013;735:1-22.
- 862 28. DuMont AL, Torres VJ. Cell targeting by the *Staphylococcus aureus* pore-forming toxins: it's  
863 not just about lipids. *Trends Microbiol*. 2014;22(1):21-7.
- 864 29. Dal Peraro M, van der Goot FG. Pore-forming toxins: ancient, but never really out of fashion.  
865 *Nat Rev Microbiol*. 2016;14(2):77-92.
- 866 30. Yamashita K, Kawai Y, Tanaka Y, Hirano N, Kaneko J, Tomita N, et al. Crystal structure of the  
867 octameric pore of staphylococcal gamma-hemolysin reveals the beta-barrel pore formation mechanism  
868 by two components. *Proc Natl Acad Sci U S A*. 2011;108(42):17314-9.



- 869 31. Yamashita D, Sugawara T, Takeshita M, Kaneko J, Kamio Y, Tanaka I, et al. Molecular basis  
870 of transmembrane beta-barrel formation of staphylococcal pore-forming toxins. *Nat Commun.*  
871 2014;5:4897.
- 872 32. Chiu SW, Leake MC. Functioning nanomachines seen in real-time in living bacteria using  
873 single-molecule and super-resolution fluorescence imaging. *Int J Mol Sci.* 2011;12(4):2518-42.
- 874 33. Spaan AN, van Strijp JAG, Torres VJ. Leukocidins: staphylococcal bi-component pore-forming  
875 toxins find their receptors. *Nat Rev Microbiol.* 2017;15(7):435-47.
- 876 34. Unnewehr H, Rittirsch D, Sarma JV, Zetoune F, Flierl MA, Perl M, et al. Changes and  
877 regulation of the C5a receptor on neutrophils during septic shock in humans. *J Immunol.*  
878 2013;190(8):4215-25.
- 879 35. Plank M, Wadhams GH, Leake MC. Millisecond timescale slimfield imaging and automated  
880 quantification of single fluorescent protein molecules for use in probing complex biological processes.  
881 *Integr Biol (Camb).* 2009;1(10):602-12.
- 882 36. Miller H, Zhou Z, Wollman AJ, Leake MC. Superresolution imaging of single DNA molecules  
883 using stochastic photoblinking of minor groove and intercalating dyes. *Methods.* 2015;88:81-8.
- 884 37. Wollman AJ, Leake MC. Millisecond single-molecule localization microscopy combined with  
885 convolution analysis and automated image segmentation to determine protein concentrations in  
886 complexly structured, functional cells, one cell at a time. *Faraday Discuss.* 2015;184:401-24.
- 887 38. Leake MC, Chandler JH, Wadhams GH, Bai F, Berry RM, Armitage JP. Stoichiometry and  
888 turnover in single, functioning membrane protein complexes. *Nature.* 2006;443(7109):355-8.
- 889 39. Leake MC. Analytical tools for single-molecule fluorescence imaging in cellulose. *Phys Chem*  
890 *Chem Phys.* 2014;16(25):12635-47.

- 891 40. Leake MC, Greene NP, Godun RM, Granjon T, Buchanan G, Chen S, et al. Variable  
892 stoichiometry of the TatA component of the twin-arginine protein transport system observed by in vivo  
893 single-molecule imaging. *Proc Natl Acad Sci U S A*. 2008;105(40):15376-81.
- 894 41. Llorente-Garcia I, Lenn T, Erhardt H, Harriman OL, Liu LN, Robson A, et al. Single-molecule  
895 in vivo imaging of bacterial respiratory complexes indicates delocalized oxidative phosphorylation.  
896 *Biochim Biophys Acta*. 2014;1837(6):811-24.
- 897 42. Robson A, Burrage K, Leake MC. Inferring diffusion in single live cells at the single-molecule  
898 level. *Philos Trans R Soc Lond B Biol Sci*. 2013;368(1611):20120029.
- 899 43. von Kockritz-Blickwede M, Konrad S, Foster S, Gessner JE, Medina E. Protective role of  
900 complement C5a in an experimental model of *Staphylococcus aureus* bacteremia. *J Innate Immun*.  
901 2010;2(1):87-92.
- 902 44. Walport MJ. Complement. Second of two parts. *N Engl J Med*. 2001;344(15):1140-4.
- 903 45. Pandya PH, Wilkes DS. Complement system in lung disease. *Am J Respir Cell Mol Biol*.  
904 2014;51(4):467-73.
- 905 46. Li R, Coulthard LG, Wu MC, Taylor SM, Woodruff TM. C5L2: a controversial receptor of  
906 complement anaphylatoxin, C5a. *FASEB J*. 2013;27(3):855-64.
- 907 47. Veya L, Piguet J, Vogel H. Single Molecule Imaging Deciphers the Relation between Mobility  
908 and Signaling of a Prototypical G Protein-coupled Receptor in Living Cells. *J Biol Chem*.  
909 2015;290(46):27723-35.
- 910 48. Pedelacq JD, Maveyraud L, Prevost G, Baba-Moussa L, Gonzalez A, Courcelle E, et al. The  
911 structure of a *Staphylococcus aureus* leucocidin component (LukF-PV) reveals the fold of the water-  
912 soluble species of a family of transmembrane pore-forming toxins. *Structure*. 1999;7(3):277-87.

- 913 49. Guillet V, Roblin P, Werner S, Coraiola M, Menestrina G, Monteil H, et al. Crystal structure of  
914 leucotoxin S component: new insight into the Staphylococcal beta-barrel pore-forming toxins. *J Biol*  
915 *Chem.* 2004;279(39):41028-37.
- 916 50. Olson R, Nariya H, Yokota K, Kamio Y, Gouaux E. Crystal structure of staphylococcal LukF  
917 delineates conformational changes accompanying formation of a transmembrane channel. *Nat Struct*  
918 *Biol.* 1999;6(2):134-40.
- 919 51. Nocadello S, Minasov G, Shuvalova L, Dubrovskaya I, Sabini E, Bagnoli F, et al. Crystal  
920 structures of the components of the Staphylococcus aureus leukotoxin ED. *Acta Crystallogr D Struct*  
921 *Biol.* 2016;72(Pt 1):113-20.
- 922 52. Laventie BJ, Guerin F, Mourey L, Tawk MY, Jover E, Maveyraud L, et al. Residues essential  
923 for Panton-Valentine leukocidin S component binding to its cell receptor suggest both plasticity and  
924 adaptability in its interaction surface. *PLoS One.* 2014;9(3):e92094.
- 925 53. Rabiet MJ, Huet E, Boulay F. Complement component 5a receptor oligomerization and  
926 homologous receptor down-regulation. *J Biol Chem.* 2008;283(45):31038-46.
- 927 54. Moreno-Fernandez ME, Aliberti J, Groeneweg S, Kohl J, Chougnet CA. A Novel Role for the  
928 Receptor of the Complement Cleavage Fragment C5a, C5aR1, in CCR5-Mediated Entry of HIV into  
929 Macrophages. *AIDS Res Hum Retroviruses.* 2016;32(4):399-408.
- 930 55. Croker DE, Halai R, Fairlie DP, Cooper MA. C5a, but not C5a-des Arg, induces upregulation of  
931 heteromer formation between complement C5a receptors C5aR and C5L2. *Immunol Cell Biol.*  
932 2013;91(10):625-33.
- 933 56. Miles G, Movileanu L, Bayley H. Subunit composition of a bicomponent toxin: staphylococcal  
934 leukocidin forms an octameric transmembrane pore. *Protein Sci.* 2002;11(4):894-902.

- 935 57. Sugawara N, Tomita T, Sato T, Kamio Y. Assembly of *Staphylococcus aureus* leukocidin into a  
936 pore-forming ring-shaped oligomer on human polymorphonuclear leukocytes and rabbit erythrocytes.  
937 *Biosci Biotechnol Biochem.* 1999;63(5):884-91.
- 938 58. LaChapelle S, Tweten RK, Hotze EM. Intermedilysin-receptor interactions during assembly of  
939 the pore complex: assembly intermediates increase host cell susceptibility to complement-mediated  
940 lysis. *J Biol Chem.* 2009;284(19):12719-26.
- 941 59. Guo RF, Ward PA. Role of C5a in inflammatory responses. *Annu Rev Immunol.* 2005;23:821-  
942 52.
- 943 60. Veldkamp KE, Heezius HC, Verhoef J, van Strijp JA, van Kessel KP. Modulation of neutrophil  
944 chemokine receptors by *Staphylococcus aureus* supernate. *Infect Immun.* 2000;68(10):5908-13.
- 945 61. Zacharias DA, Violin JD, Newton AC, Tsien RY. Partitioning of lipid-modified monomeric  
946 GFPs into membrane microdomains of live cells. *Science.* 2002;296(5569):913-6.
- 947 62. von Stetten D, Noirclerc-Savoie M, Goedhart J, Gadella TW, Jr., Royant A. Structure of a  
948 fluorescent protein from *Aequorea victoria* bearing the obligate-monomer mutation A206K. *Acta*  
949 *Crystallogr Sect F Struct Biol Cryst Commun.* 2012;68(Pt 8):878-82.
- 950 63. Hirota N, Yasuda D, Hashidate T, Yamamoto T, Yamaguchi S, Nagamune T, et al. Amino acid  
951 residues critical for endoplasmic reticulum export and trafficking of platelet-activating factor receptor.  
952 *The Journal of biological chemistry.* 2010;285(8):5931-40.
- 953 64. Amdahl H, Haapasalo K, Tan L, Meri T, Kuusela PI, van Strijp JA, et al. Staphylococcal  
954 protein Ecb impairs complement receptor-1 mediated recognition of opsonized bacteria. *PLoS One.*  
955 2017;12(3):e0172675.
- 956 65. Wouters FS, Verveer PJ, Bastiaens PI. Imaging biochemistry inside cells. *Trends Cell Biol.*  
957 2001;11(5):203-11.

- 958 66. Badrinarayanan A, Reyes-Lamothe R, Uphoff S, Leake MC, Sherratt DJ. In vivo architecture  
959 and action of bacterial structural maintenance of chromosome proteins. *Science*. 2012;338(6106):528-  
960 31.
- 961 67. Delalez NJ, Wadhams GH, Rosser G, Xue Q, Brown MT, Dobbie IM, et al. Signal-dependent  
962 turnover of the bacterial flagellar switch protein FliM. *Proc Natl Acad Sci U S A*. 2010;107(25):11347-  
963 51.
- 964 68. Reyes-Lamothe R, Sherratt DJ, Leake MC. Stoichiometry and architecture of active DNA  
965 replication machinery in *Escherichia coli*. *Science*. 2010;328(5977):498-501.
- 966 69. Lenn T, Leake MC, Mullineaux CW. Clustering and dynamics of cytochrome bd-I complexes  
967 in the *Escherichia coli* plasma membrane in vivo. *Mol Microbiol*. 2008;70(6):1397-407.
- 968
- 969

970 **Legends**

971 **Figure 1. Toxin functionality on PMN and HEK cells.** (A) PMN cell permeability in the presence of  
972 unlabeled LukSK281CY113H and LukFK288C (mS+mF, number of biological replicates n=2), Alexa-  
973 labeled mS\* or mF\* and wild type LukF (F(wt)) or LukS, (S(wt)) (n=1), compared to PMN cell  
974 permeability of S(wt) and F(wt), (n=3); (B) Inhibition of 3 µg/ml of FITC-labeled S(wt) (n=3) and mS\*  
975 (n=1) binding to PMN cell by mS; Permeability dose dependencies for (A) and (B) are shown with a  
976 polynomial spline fit, statistical significance indicated between low (0.3 and 0.001 nM) and high (300  
977 nM) toxin concentrations using Student's *t*-test. Error bars indicate SD. (C) Column indicating binding  
978 responses for mF\* on hC5aR cells (n=2). \*\*\* Indicates a statistically significant difference (p<0.001)  
979 between mS\* binding on HEK-hC5aR cells compared to HEK-CCR2 and mF\* binding on these cells.  
980 (D) Permeability of hC5aR transfected HEK cells using unlabelled mS and mF, and Alexa-labeled mS\*  
981 and mF\* compared to wild type S(wt) and F(wt) (n=2). (E) Inhibition of 3 µg/ml of mS\* binding by  
982 mS on HEK-hC5aR cells, (n=3). CCR2-transfected HEK cells used as negative controls for toxin  
983 binding and lysis in (C, D) n=2 or (C) one representative experiment. Dose dependency shown with  
984 polynomial spline fit. Statistical significance calculated between low (0.3 and 0.001 nM) and high  
985 (300 nM) toxin concentrations using Student's *t*-test. (F) Permeability response of hC5aR-transfected  
986 HEK cells following incubation with unlabeled mS and Alexa maleimide-labeled mF\* or wild type  
987 toxins F(wt) and S(wt) (n=3). Statistical significance calculated between 15 min and 0 min time points  
988 using Student's *t*-test. Error bars indicate SD. Percentages of mean fluorescence intensities is shown as  
989 relative to the maximum intensity in each individual experiment (B, C and E). Permeability of the cells  
990 were analyzed after 30 minutes incubation at +37°C while the inhibition assays were analyzed after 45  
991 minutes incubation at +4°C.

992

993 **Figure 2. Colocalization of LukS with hC5aR on HEK cells.** (A) (left panel) TIRF image of hC5aR-  
994 mGFP on the surface of a HEK cell before addition of toxin; (right panels) zoom-in of yellow dashed  
995 square of left panel immediately following 2 min incubation with Alexa647-labeled  
996 LukSK281CY113H (mS\*-Alexa647). (B) Equivalent images of same cell of (B) after > 15 min  
997 incubation with LukFK288C (mF). (C) (upper panel) TIRF image of colocalization of Alexa594- and  
998 Alexa647-labeled mF and mS (mF\*Alexa594 and mS\*Alexa647) with hC5aR-mGFP on HEK cells;  
999 (lower panel) zoom-in of yellow-dashed square of upper panel with colocalized foci indicated (white  
1000 arrow).

1001

1002 **Additional file 1: Figure S1. Construction of recombinant leukocidin proteins.** (A) Schematic of  
1003 TIRF imaging assay. (B) (left panel) Crystal structure of octameric pore complex of  $\gamma$ -hemolysin (PDB  
1004 ID:3B07). K273/Y111 and K289 on S and F components of  $\gamma$ -hemolysin corresponds to our engineered  
1005 mutations, K281C/Y113H and K288C, on LukSF marked in their equivalent places on  $\gamma$ -hemolysin;  
1006 (right panel) SDS-PAGE of the unlabeled LukSK281CY113H and LukFK288C (mLukS and mLukF)  
1007 and Alexa-labeled mLukS\* and mLukF\* toxin components, bands visible at locations consistent with  
1008 molecular weight of 33 kDa and 34 kDa for LukS and LukF respectively.

1009

1010 **Figure 3. Spatiotemporal dynamics of hC5aR, LukS and LukF in live cells.** (A) Images of HEK  
1011 cells treated with LukSK281CY113H (mS) and Alexa-labeled LukFK288C (mF\*) showing brightfield  
1012 (left), hC5aR-mGFP (middle) and mF\* (right). (B) Probability distribution for stoichiometry of hC5aR  
1013 in absence and presence of Alexa-labeled mS (mS\*) and mF\*, and (C) of mS\* foci, indicating (D)  
1014 tetramer periodicity from Fourier spectral analysis. (E) A random tetramer overlap model cannot  
1015 account for mS\* experimental stoichiometry data ( $R^2 < 0$ ), but a tetramer-multimer model results in

1016 excellent agreement ( $R^2=0.85$ ). (F) hC5aR and mS\* stoichiometry as a function of incubation time.  
1017 Proportion of immobile and mobile colocalized foci in the (G) presence and absence of mS and mF.  
1018 Error bars show standard error of the mean from n=5-15 image subregions.

1019

1020

1021 **Additional file 2: Figure S2. Fluorescent protein characterization.** A. Fluorescence micrograph of  
1022 immobilized mGFP and an intensity vs. time trace for one foci showing a single photobleach step. Raw  
1023 data in light blue and edge-preserving Chung-Kennedy filtered data in dark blue. B. As A for LukS-  
1024 Alexa647, C. LukS-Alexa647 micrograph (red) with found foci indicated as white circles. D. Intensity  
1025 distribution of Alexa 647 foci intensities from whole photobleach experiment showing periodicity at  
1026 ~3,500 counts on our camera detector. E. Pairwise distance distribution of intensity in D with Fourier  
1027 spectrum (inset) showing peak at ~4,000 counts. F. GFP foci intensity (natural log) time traces (green)  
1028 with linear fits (red).

1029

1030

1031

1032 **Additional file 3: Figure S3. Density of LukS spots.** A. micrograph of mLukS\* (white) with found  
1033 foci (orange circles) B. Probability distribution of overlap frequency using spots in A to calculate  
1034 density. C. Zoom in of mLukS micrograph. D. Probability distribution of overlap frequency using  
1035 intensity in C to calculate maximum density estimate.

1036

1037

1038 **Additional file 4: Figure S4. Mobility analysis.** A. The probability distribution of microscopic  
1039 diffusion coefficient showing the threshold for immobility as black dotted line and B. the mean squared



1040 displacement against time interval for mobile (upper) and immobile (lower) of hC5aR. C. and D.  
1041 similar for mLukS/F\*. An insert showing a zoomed in portion of the plot is shown in C. to better  
1042 illustrate the division between mobile and immobile.

1043

1044 **Figure 4. Relative stoichiometry of hC5aR, LukS and LukF in fixed cells.** (A) Micrographs of fixed  
1045 hC5aR-mGFP HEK cells treated with LukSK281CY113H (mS) and LukFK288C (mF) showing  
1046 hC5aR-mGFP (left) and Alexa647 (middle) and merge (right) on Alexa-labeled mS (mS\*) above and  
1047 mF (mF\*) below (B) Proportion of foci colocalized and not colocalized, treated with mS, mS\*+mF and  
1048 mS+mF\* for hC5aR. Error bars show standard error of the mean from n=4 image subregions. (C)  
1049 Heatmap of correlation between hC5aR and mS stoichiometry (red dash line indicates 4 mS per hC5aR  
1050 molecule),  $R^2 \sim 0.15$  (D) and (E) FRET images and efficiencies. The FRET experiment was performed  
1051 in live and fixed sortase-tagged FITC-hC5aR expressing cells. Live cells (number of biological  
1052 replicates n=2) were incubated in the presence of Cy3-labeled mS\* for 1 h at +4°C and washed, after  
1053 which unlabeled mF was added. FRET was analyzed before (mS\*) or after addition of mF (mS\*+mF).  
1054 FRET from fixed cells (n=3) was analyzed in the presence of mS\* or unlabeled mS and Cy3-labeled  
1055 mF\* respectively (n=2). Statistical significance between cells with only mS and both of the toxin  
1056 components, mS and mF, was analyzed using Student's *t*-test. Error bars indicate SD.

1057

1058 **Additional file 5: Figure S5. Colocalization analysis.** The probability distribution of linked (A) and  
1059 unlinked (B) hC5aR and similar for mLukS\* (C. and D.). E. and F. False-color heatmap scatter plots  
1060 indicating that h5CaR stoichiometry is uncorrelated to mLukS or mLukF stoichiometry in the presence  
1061 of mLukF.

1062

1063

1064 **Figure 5. LukSF dissociation and rebinding of C5a on hC5aR expressing cells.** (A) Inhibition of  
1065 anti-CD88 binding on hC5aR expressing HEK cells using increasing concentrations (horizontal axis) of  
1066 wild type LukS, S(wt) and C5a. Wild type LukF, F(wt), is used as a negative control for inhibition of  
1067 anti-CD88 binding (number of biological repeats n=2). The values are normalized against the  
1068 maximum binding observed with only anti-CD88. (B) Disengagement of hC5aR from LukSF was  
1069 observed as increase in PE conjugated anti-CD88 binding (right vertical axis, indicated with bars) on  
1070 S(wt) pre-coated cells using increasing but sublytic concentrations (horizontal axis, indicated with dots)  
1071 of F(wt). The values are normalized against the maximum binding observed with LukS incubated cells  
1072 with only anti-CD88. Minimal cell lysis (% of lysed cells, left vertical axis) detected in F(wt)  
1073 concentrations below 3 nM (n=3). (C) Rebinding of constant amount of NT647 labeled C5a (647-C5a)  
1074 on hC5aR upon LukSF formation analyzed by incubating S(wt) pre-coated cells with increasing  
1075 concentrations (horizontal axis) of LukF mutant G130D that associates with LukS but does not lead to  
1076 cell lysis (n=2). The values are normalized against the maximum binding observed with only 657-C5a.  
1077 (D) Effect of LukSF mediated cell lysis on complement activation and C5a formation on full blood  
1078 measured by using C5b-9 as a marker for complement activation in plasma (n=3). Maximal C5a  
1079 formation is observed by incubating full blood with live *S. aureus* bacteria. Ecb (B and C), F(wt) (A) or  
1080 S(wt) (D) are used as negative controls in the assays. Percentages of mean fluorescence intensities is  
1081 shown as relative to the maximal intensity in each individual experiment (A-C). Statistical  
1082 significances are calculated using Student's *t*-test. Error bars indicate SD.

**Figure 6. Model for LukSF-receptor binding and the mechanism of LukSF-induced**

**inflammation.** (A). LukS (PDB ID: 1T5R) binds on hC5aR (structure based on angiotensin receptor data PDB ID: 4YAY, cyan dashed box) as a soluble monomer on the cell membrane. Each LukS monomer binds one hC5aR molecule via the receptor interacting residues R73, Y184, Y250, T244 (marked with blue dots) within a cluster of approximately 4-5 hC5aR homo-oligomers. Upon binding to hC5aR LukS exposes residues for LukF (PDB ID: 1LKf) binding (interface indicated by dashed ellipse). In these tight clusters each LukF can bind to two LukS monomers via two interfaces. Binding of LukF on LukS and formation of the octameric pore (PDB ID: 3B07) causes dissociation of the receptors from the complex because of leakage of the cell membrane and possibly also since the receptor binding region (marked with a circle) is buried between the monomers in the complex. The detached hC5aR molecule can be reused by its ligands LukS or C5a anaphylatoxin (PDB ID: 1KJS).

(B) Zoom out of (A), illustrating the putative mechanism of LukSF induced inflammation.

1083

1084

1085 **Additional file 6: Movie S1 (.avi).** Deposition of mLukS on hC5aR-mGFP HEK cells. The movie is  
1086 shown in two clips before (no toxin) and after addition of Alexa 595 labeled mLukS (add mLukS\*).

1087 This movie was recorded for *ca.* 13 min and displayed here at 100x speed.

1088

1089 **Additional file 7: Movie S2 (.avi).** Lysis of hC5aR-mGFP HEK cells incubated with Alexa594 labeled  
1090 mLukS\* and mLukF. The cells were preincubated with mLukS\* and the lysis of the cells were

1091 monitored for *ca.* 13 min after addition of mLukF (add mLukF). The red arrow points to the vesicles  
1092 released during cell lysis. This movie was recorded for *ca.* 13 min and displayed here at 100x speed.

1093

1094 **Additional file 8: Movie S3 (.avi).** Imaging live hC5aR-mGFP cells. After 1-2 min of exposure,  
1095 several distinct, mobile, circular fluorescent foci in the planer membrane regions were observed. Movie  
1096 is displayed in real time.

1097

1098 **Additional file 9: Movie S4 (.avi).** Imaging mLukS\* incubated with hC5aR-mGFP cells. Several  
1099 distinct, mobile, circular fluorescent foci were observed. Movie is displayed in real time.

1100

1101

1102

1103

1104

1105

1106

1107

1108

## Figures

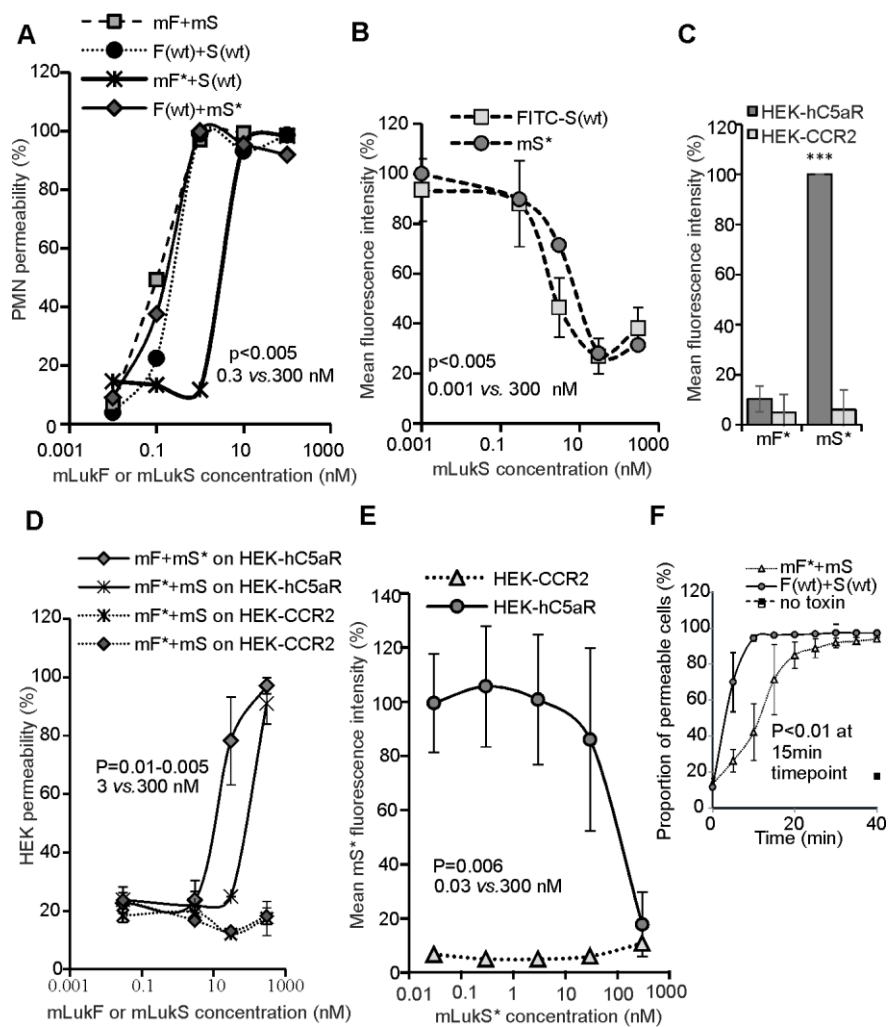

**Figure 1. Toxin functionality on PMN and HEK cells.**

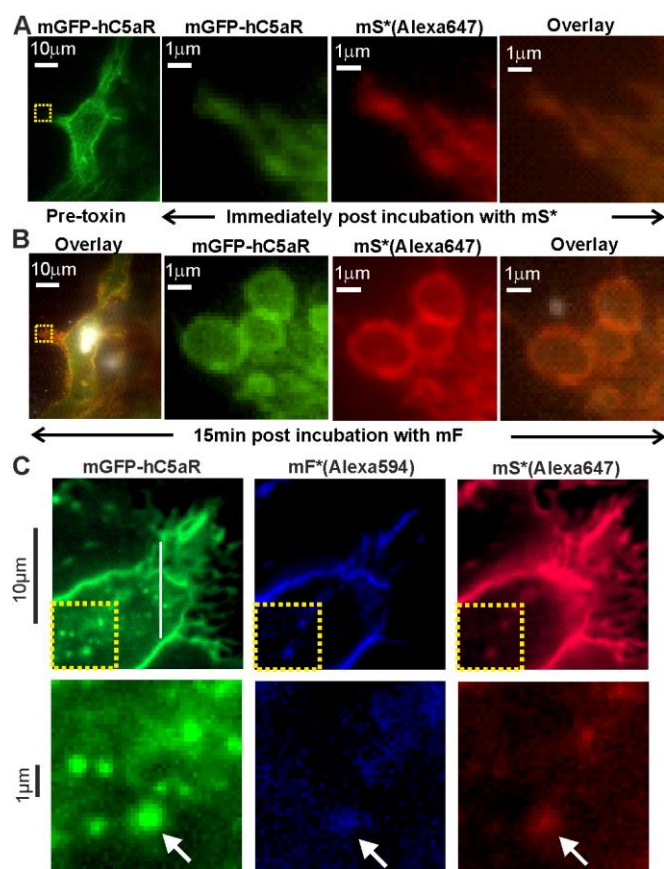

**Figure 2. Colocalization of LukS with hC5aR on HEK cells.**

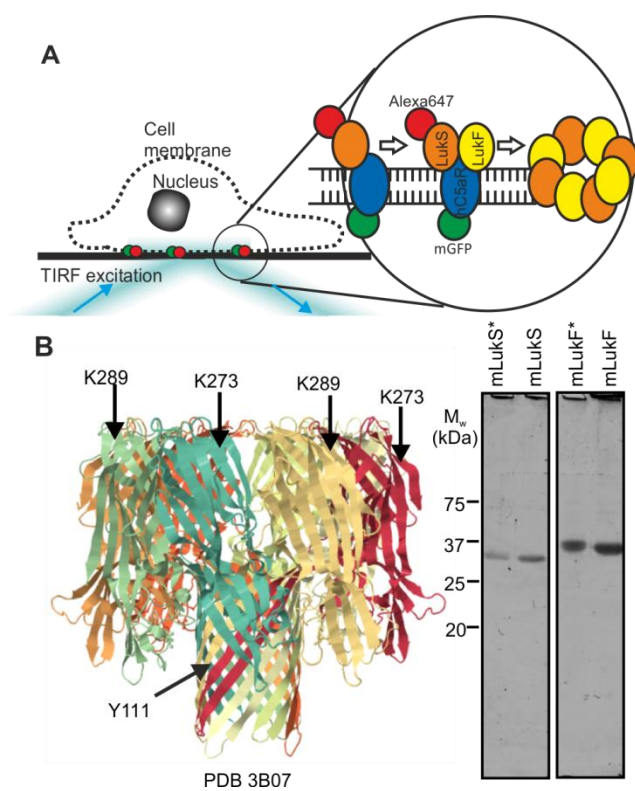

**Additional file 1: Figure S1. Construction of recombinant leukocidin proteins.**

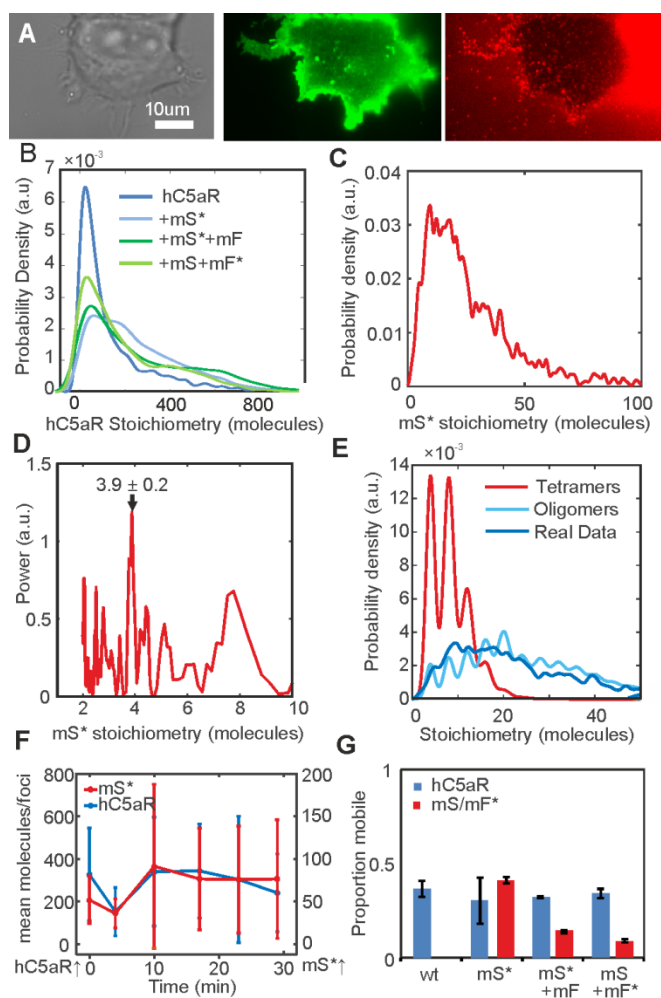

**Figure 3. Spatiotemporal dynamics of hC5aR, LukS and LukF in live cells.**



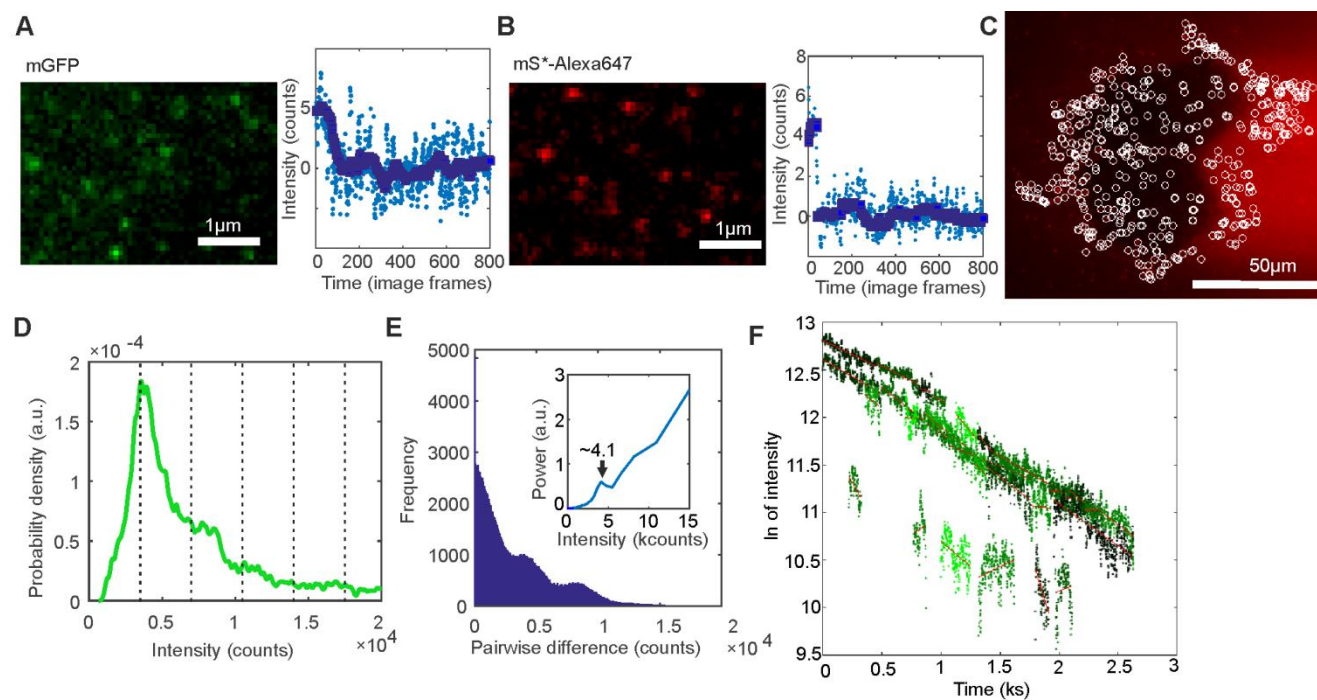

**Additional file 2: Figure S2. Fluorescent protein characterization.**

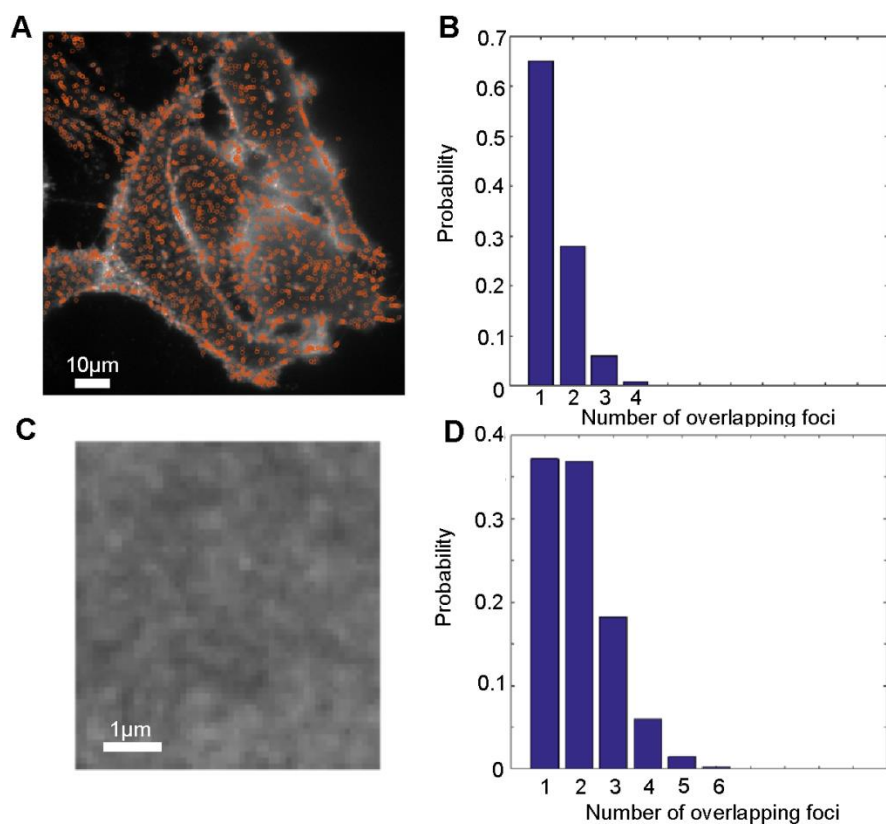

**Additional file 3: Figure S3. Density of LukS spots.**

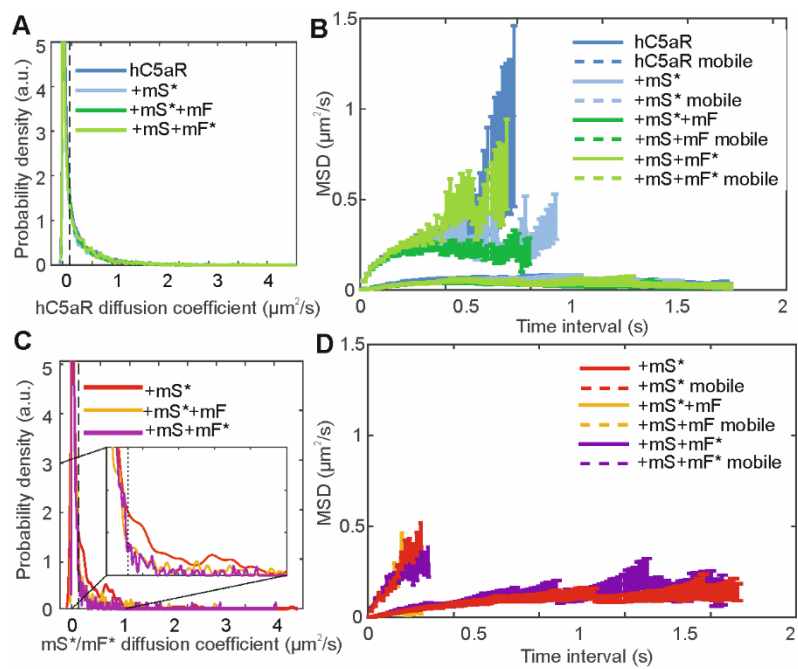

**Additional file 4: Figure S4. Mobility analysis.**

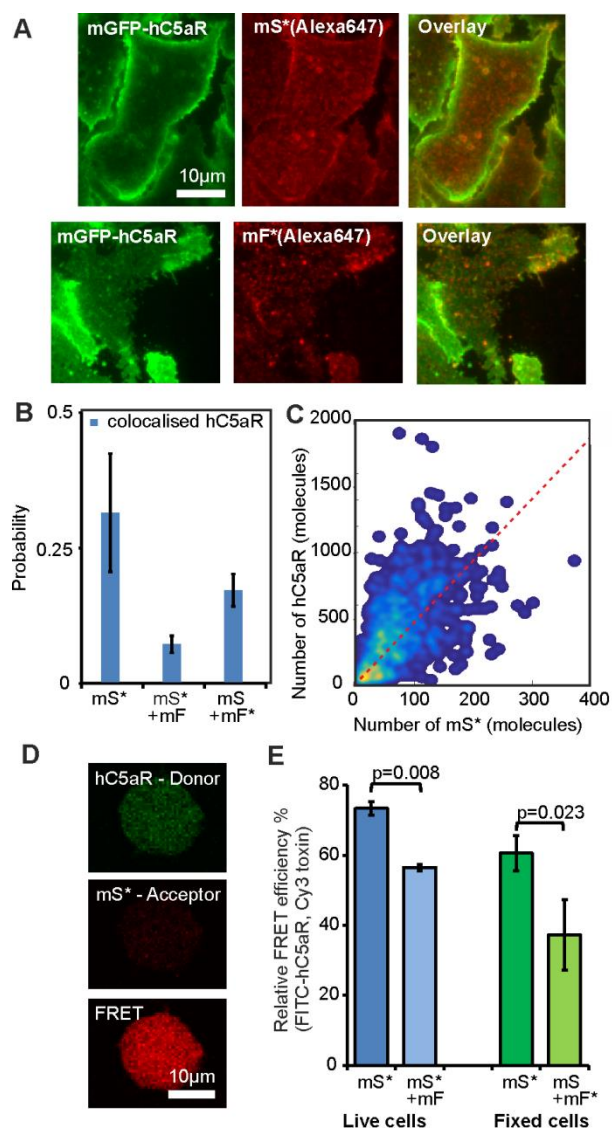

**Figure 4. Relative stoichiometry of hC5aR, LukS and LukF in fixed cells.**

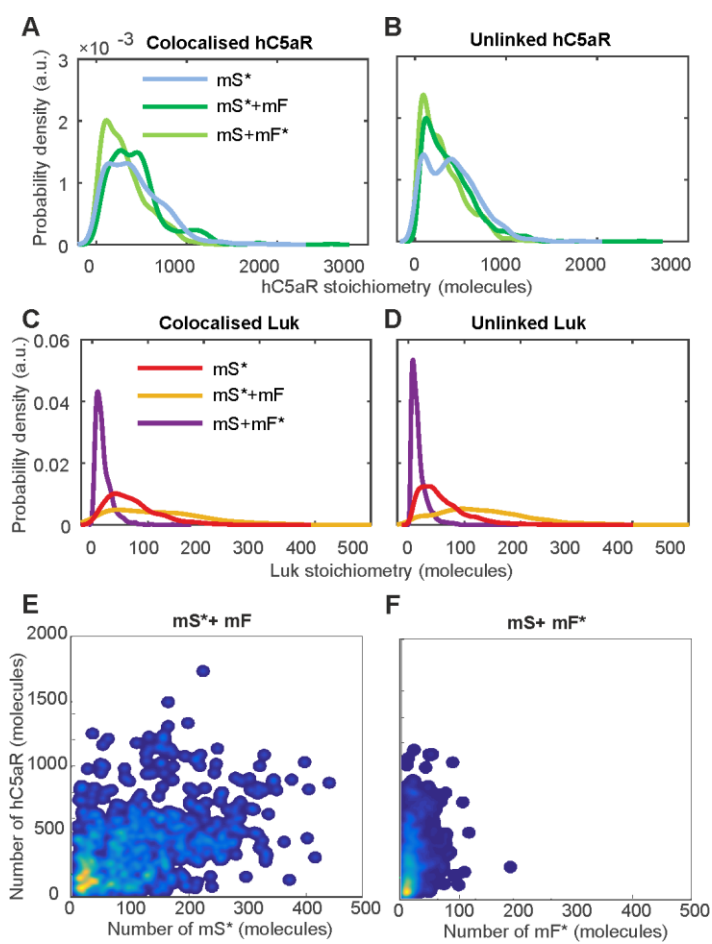

**Additional file 5: Figure S5. Colocalization analysis.**

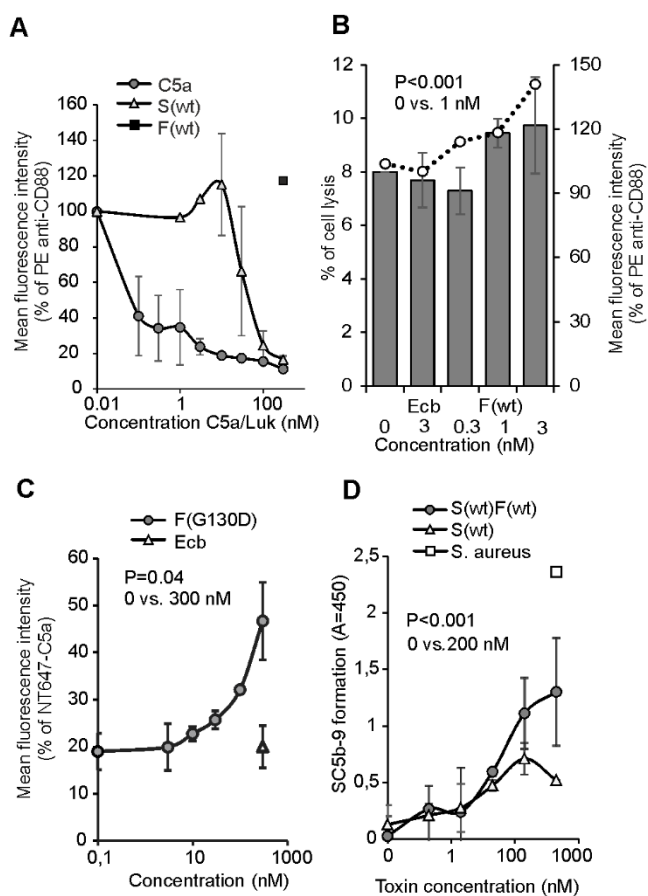

**Figure 5. LukSF dissociation and rebinding of C5a on hC5aR expressing cells.**

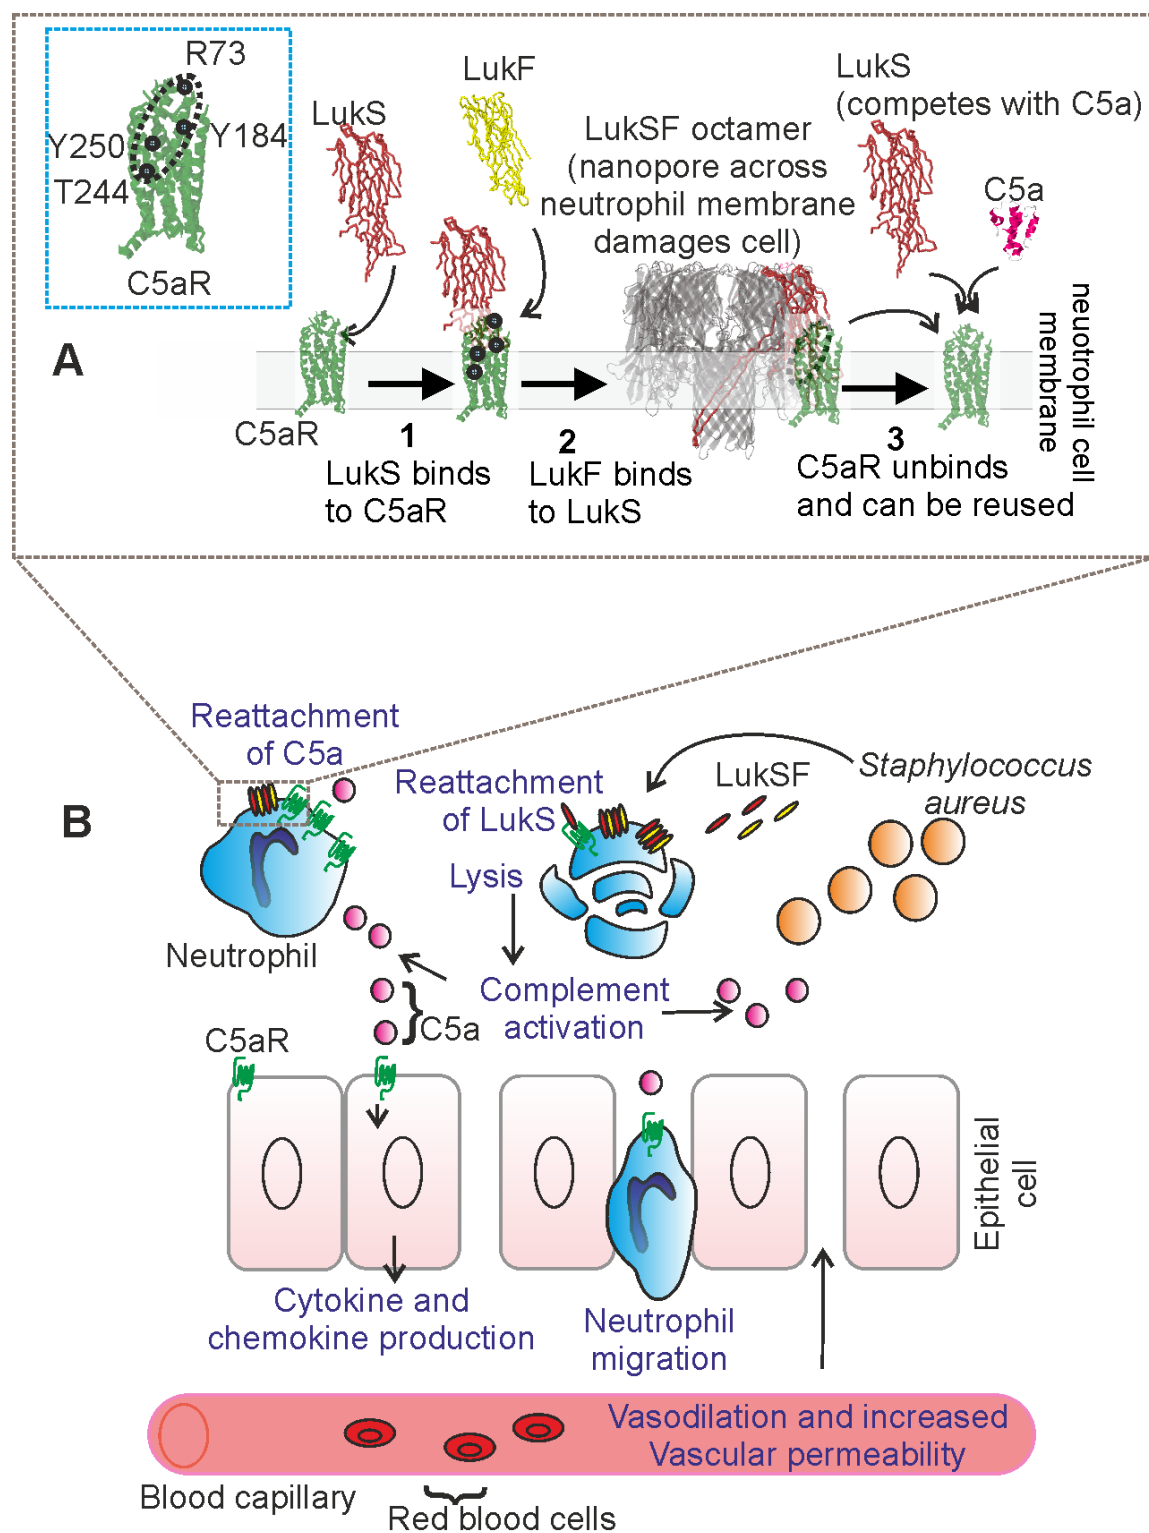

**Figure 6. Model for LukSF-receptor binding and the mechanism of LukSF-induced inflammation.**

1110 Table 1. Mean and standard deviation stoichiometry and diffusion constant in live and fixed cells.

1111 Live cells:

|                  | Mean [SD]<br>stoichiometry<br>(molecules) | Number of foci | Mobile foci mean<br>[SD] $D$<br>( $\mu^2\text{m/s}$ ) | Immobile foci mean<br>[SD] $D$<br>( $\mu^2\text{m/s}$ ) |
|------------------|-------------------------------------------|----------------|-------------------------------------------------------|---------------------------------------------------------|
| C5a              | 185[224]                                  | 5346           | 0.48[0.43]                                            | 0.03[0.03]                                              |
| C5a+mLukS*       | 281[213]                                  | 8272           | 0.49[0.42]                                            | 0.02[0.03]                                              |
| C5a+mLukS*+mLukF | 291[248]                                  | 6605           | 0.46[0.42]                                            | 0.03[0.03]                                              |
| C5a+mLukS+mLukF* | 223[202]                                  | 4981           | 0.47[0.40]                                            | 0.02[0.03]                                              |
| mLukS*           | 29[22]                                    | 999            | 0.44[0.45]                                            | 0.03[0.03]                                              |
| mLukS*+mLukF     | 84[89]                                    | 841            | 0.34[0.35]                                            | 0.01[0.02]                                              |
| mLukS+mLukF*     | 6[4]                                      | 557            | 0.40[0.44]                                            | 0.02[0.03]                                              |

1112

1113 Fixed cells:

|                  | Number and (%) of<br>colocalized C5a foci    | Number and (%) of<br>C5a foci not<br>colocalized | Mean [SD]<br>stoichiometry of<br>colocalized C5a foci<br>(molecules) | Mean [SD]<br>stoichiometry of C5a<br>foci which are not<br>colocalized<br>(molecules) |
|------------------|----------------------------------------------|--------------------------------------------------|----------------------------------------------------------------------|---------------------------------------------------------------------------------------|
| C5a+mLukS*       | 89(32)                                       | 193(68)                                          | 36[26]                                                               | 35[24]                                                                                |
| C5a+mLukS*+mLukF | 84(7)                                        | 1079(93)                                         | 37[25]                                                               | 32[24]                                                                                |
| C5a+mLukS+mLukF* | 59(83)                                       | 283(17)                                          | 26[20]                                                               | 26[20]                                                                                |
|                  |                                              |                                                  |                                                                      |                                                                                       |
|                  | Number and (%) of<br>colocalized Luk<br>foci | Number and (%) of<br>Luk foci not<br>colocalized | Mean [SD]<br>stoichiometry of<br>colocalized Luk foci<br>(molecules) | Mean [SD]<br>stoichiometry of Luk<br>foci which are not<br>colocalized<br>(molecules) |
| mLukS*           | 88(7)                                        | 1198(93)                                         | 72[47]                                                               | 61[44]                                                                                |
| mLukS*+mLukF     | 86(88)                                       | 658(12)                                          | 121[95]                                                              | 136[94]                                                                               |
| mLukS+mLukF*     | 60(5)                                        | 1186(95)                                         | 20[16]                                                               | 18[15]                                                                                |

1114

1115



1116

1117

1118

1119

1120

1121

1122

Table 2. Cloning sequence details

| Clone (restriction site)                                 | Primers, gBlock (5'-3')                                                                                                                                                                                                                                                                                                                                                                                                                                                                                                                                        |
|----------------------------------------------------------|----------------------------------------------------------------------------------------------------------------------------------------------------------------------------------------------------------------------------------------------------------------------------------------------------------------------------------------------------------------------------------------------------------------------------------------------------------------------------------------------------------------------------------------------------------------|
| 3' mGFP (NotI) stop                                      | ATATGCGGCCGCTTATTTGTATAGTTCATCCATG                                                                                                                                                                                                                                                                                                                                                                                                                                                                                                                             |
| 5' KOZ-hC5aR (BamHI)                                     | ATATGGATCCGCCGCCACCATGAACTCCTTCAATTATAC                                                                                                                                                                                                                                                                                                                                                                                                                                                                                                                        |
| 5' hC5aR-mGFP                                            | AGACCCAGGCAGTGAGTAAAGGAGAAGAACTTTTC                                                                                                                                                                                                                                                                                                                                                                                                                                                                                                                            |
| 3' hC5aR-mGFP                                            | TCTCCTTACTCACTGCCTGGGTCTTCTGGGCCATAG                                                                                                                                                                                                                                                                                                                                                                                                                                                                                                                           |
| 5' N-sor-hC5aR                                           | CGGGATCCGCCGCCACCATGCTACCCGAGACTGGAGCGGAGGTGGCAACTCCTTCAATTATACCAC                                                                                                                                                                                                                                                                                                                                                                                                                                                                                             |
| 3' hC5aR-not                                             | ATATGCGGCCGCTTACACTGCCTGGGTCTTCTG                                                                                                                                                                                                                                                                                                                                                                                                                                                                                                                              |
| 5' LukF-                                                 | CGGGATCCGCTCAACATATCACACCTGTAAG                                                                                                                                                                                                                                                                                                                                                                                                                                                                                                                                |
| 3' LukF-K288C (NotI)                                     | ATATGCGGCCGCTTAGCTCATAGGATTTTTTCTTAGATTGAGTATCTATTAAGCAAAGTGTATGA<br>TTTTCCCAATC                                                                                                                                                                                                                                                                                                                                                                                                                                                                               |
| 3' LukS-K281C (NotI)                                     | ATATGCGGCCGCTCAATTATGTCCTTTCACGCAAATTCATGAGTTTTCC                                                                                                                                                                                                                                                                                                                                                                                                                                                                                                              |
| 5' LukS-Y113H                                            | GTCAAACATTAGGTCATAACATAGGTGGTAATTTTAATAG                                                                                                                                                                                                                                                                                                                                                                                                                                                                                                                       |
| 3' LukS-Y113H                                            | TTACCACCTATGTTATGACCTAATGTTTGACTAAC                                                                                                                                                                                                                                                                                                                                                                                                                                                                                                                            |
| 5' LukS (BamHI)                                          | CGGGATCCAAAGCTGATAACAATATTGAG                                                                                                                                                                                                                                                                                                                                                                                                                                                                                                                                  |
| LukFG130D gBlock<br>BamHI/ NotI pRSET<br>B C-his overlap | CTTTAAGAAGGAGATATACATATGGGATCCCAACATATCACACCTGTAAGTGAGAAAAAGGTTGA<br>TGATAAAATTACTTTGTACAAAACAACTGCAACATCAGATTCGGATAAGTTAAAAATTTCTCAGA<br>TTTTAACTTTAATTTTATTAAGATAAAAGTTATGATAAAGATACATTAATACTCAAAGCTGCT<br>GGAAACATTTATTCTGGCTATACAAAGCCAAATCCAAAAGACACTATTAGTCTCAATTTTATTG<br>GGGTTCTAAGTACAACATTTCAATTAATTCAGATTCTAATGACTCAGTAAACGTTGTAGATTATG<br>CACCTAAAAATCAAATGAAGAATTTCAAGTACAACAACCGTAGGTTATCTTATGGTGGAGAT<br>ATTAATATCTCTAACGGCTTGTGAGGTGATGGTAATGGTTCAAATCTTTTTCAGAGACAATTA<br>CTATAACAAGAAAGCTATAGAAGTACTAGCTTAGATAAAAGAACTAATTTCAAAAAAATTTGGTGGG |

|  |                                                                                                                                                                                                                                                                                                                                                                                                                                                                           |
|--|---------------------------------------------------------------------------------------------------------------------------------------------------------------------------------------------------------------------------------------------------------------------------------------------------------------------------------------------------------------------------------------------------------------------------------------------------------------------------|
|  | ATGTTGAAGCACATAAAATTATGAATAATGGTTGGGGACCATATGGCAGAGATAGTTATCATTC<br>ACTTATGGTAATGAAATGTTTTAGGCTCAAGACAAAGCAACTTAAATGCTGGACAAAACCTCTT<br>GGAATATCACAAAATGCCAGTGTATCCAGAGGTAACCTCAATCCAGAATTTATTGGTGTCTAT<br>CTCGAAAACAAAACGCTGCAAAAAATCAAAAATTACTGTTACTTATCAAAGAGAAATGGATAGA<br>TATACAACTTTTGAATCAACTTCACTGGATAGGTAATAATTATAAAGATGAAAATAGAGCAAC<br>TCATACATCAATTTATGAAGTTGATTGGGAAAATCATAACAGTTAAATTAATAGATACTCAATCTA<br>AGGAAAAAATCCTATGAGCGCGGCCGCACACCATCACCATCACCATTAA |
|--|---------------------------------------------------------------------------------------------------------------------------------------------------------------------------------------------------------------------------------------------------------------------------------------------------------------------------------------------------------------------------------------------------------------------------------------------------------------------------|

1123

1124
